1 ***Title: Prefrontal, striatal, and VTA subnetwork dynamics during novelty and exploration***

2 Abbreviated Title: PFC, STR, VTA network dynamics during memory

3 Adam J.O. Dede<sup>1,2,3,\*</sup>, Nader Marzban<sup>4,5</sup>, Ashutosh Mishra<sup>4,5</sup>, Robert Reichert<sup>4,5</sup>, Paul M.

4 Anderson<sup>4,5</sup>, Michael X Cohen<sup>4,5</sup>

5

6 1. Department of Psychology, University of Sheffield, Sheffield, S1 2LT, UK

7 2. Department of Pharmaceutical Care, School of Pharmaceutical Sciences, University

8 of Phayao, Phayao, 56000 Thailand

9 3. Unit of Excellence on Clinical Outcomes Research and Integration (Unicorn), School

10 of Pharmaceutical Sciences, University of Phayao, Phayao, 56000 Thailand

11 4. Radboud University Medical Center, Radboud University Nijmegen, 6500 HB,

12 Nijmegen, The Netherlands

13 5. Donders Centre for Medical Neuroscience, 6500 HB, Nijmegen, The Netherlands

14 \* correspondence: adam.osman.dede@gmail.com

15 Number of pages: 55

16 Number of figures (extended data): 7 (3)

17 Number of tables (extended data): 1 (5)

18 Word counts: abstract: 247; introduction: 473; discussion: 1487

19 Acknowledgments: MXC was funded by an ERC-StG 638589. NM and PMA were funded by

20 a Hypatia award from the Radboud University Medical Center to MXC.

21 The authors declare no competing financial interests.

22

1    **Abstract**

2    Multiple distinct brain areas have been implicated in memory including the prefrontal cortex  
3    (PFC), striatum (STR), and ventral tegmental area (VTA). Information-exchange across these  
4    widespread networks requires flexible coordination at a fine time-scale. In the present study,  
5    we collected high-density recordings from the PFC, STR, and VTA of male rats during  
6    baseline, encoding, consolidation, and retrieval stages of memory formation. Novel sub-  
7    regional clustering analyses identified patterns of spatially restricted, temporally coherent, and  
8    frequency specific signals that were reproducible across days and were modulated by  
9    behavioral states. Clustering identified miniscule patches of neural tissue. Generalized eigen  
10   decomposition (GED) reduced each cluster to a single time series. Amplitude envelope  
11   correlation of the cluster time series was used to assess functional connectivity between  
12   clusters. Dense intra- and inter regional functional connectivity characterized the baseline  
13   period, with delta oscillations playing an outsized role. There was a dramatic pruning of  
14   network connectivity during encoding. Connectivity rebounded during consolidation, but  
15   connections in the theta band became stronger, and those in the delta band were weaker.  
16   Finally, during retrieval, connections were not as severely reduced as they had been during  
17   encoding, and specifically theta and higher-frequency connections were stronger. Underlying  
18   these connectivity changes, the anatomical extent of clusters observed in the gamma band in  
19   the PFC and in both the gamma and delta bands in the VTA changed markedly across  
20   behavioral conditions. These results demonstrate the brain's ability to reorganize functionally  
21   at both the intra- and inter-regional levels during different stages of memory processing.

22

23

24

25    **SIGNIFICANCE STATEMENT:**

1 The brain is often thought of as a mosaic of areas each with static functions that activate or  
2 deactivate with task demands. Here, we used large-scale recordings (196 simultaneous  
3 electrodes) and developed a multivariate analysis approach to analyze data from all our  
4 recording locations simultaneously. This analysis revealed that the brain dramatically  
5 reorganized itself at both local and long-distance spatial scales during different stages of  
6 memory processing. These results demonstrate an extreme degree of flexibility in functional  
7 anatomy. Rather than thinking about the brain as a set of static mosaic tiles, it may better be  
8 characterized as a quickly moldable piece of clay where each part's function changes as the  
9 whole is reshaped from moment to moment.

10

11

12

13

14

## 15 **INTRODUCTION**

16

17 The study of memory has long been guided by the goal of defining the functions of various  
18 brain regions (Squire and Zola-Morgan, 2015; Lashley, 2020), yet it is increasingly recognized that  
19 the storage, retrieval, and active use of memory is supported by a distributed network including  
20 the prefrontal cortex (PFC), striatum/basal ganglia (STR), and hippocampus (HPC). For  
21 example, voxel-level analyses of fMRI data have revealed widely distributed semantic,  
22 episodic, and working memory representations (Huth et al., 2012; Rissman and Wagner,  
23 2012). Simultaneous physiological recordings from multiple areas in monkeys engaged in  
24 memory tasks have indicated complex inter-regional coordination (Constantinidis and Procyk,  
25 2004; Loonis et al., 2017), and optogenetic manipulations in rodents have demonstrated a  
26 clear interaction between the medial PFC and HPC for memory retrieval (Rajasekharan et al.,  
27 2015). Beyond memory-specific studies, coordinated activity between brain regions is

1 widely believed to allow neural circuits to flexibly bind cell assemblies and efficiently  
2 orchestrate information transfer (Singer, 2009; Jensen and Mazaheri, 2010; Wang, 2010).

3  
4 The nature of interactions between regions varies as a function of task demands. In some  
5 cases, regions appear to cooperate (Turk-Browne et al., 2009; Wimmer and Shohamy, 2012),  
6 but in others, they appear to compete (Packard and McGaugh, 1996; Wimmer et al., 2014;  
7 Loonis et al., 2017). More generally, it is unclear how these interactions are mediated, and  
8 how interactions may be different at different times during memory formation and use.

9  
10 Dopamine (DA) has been strongly implicated in synchronization and network-level dynamics  
11 (Montaron et al., 1982; Williams et al., 2002; Costa et al., 2006; Dejean et al., 2012). DA stems  
12 from the ventral tegmental area (VTA) and substantia nigra, and projects widely to most of the  
13 brain, with the densest projections into the STR, PFC, and HPC (Otmakhova et al., 2013;  
14 Kafkas and Montaldi, 2018; Kaminski et al., 2018). The VTA is therefore positioned to facilitate  
15 the coordinated processing that allows the brain to generate a memory-guided action plan  
16 from moment to moment (Fujisawa and Buzsaki, 2011; Jo et al., 2013; Beeler and Kisbye  
17 Dreyer, 2019; Freedberg et al., 2020).

18  
19 Here, we utilized rats that had been implanted with high-density recording arrays in the STR,  
20 VTA, and PFC as part of a separate project studying reward-learning. We investigated how  
21 intra- and inter-regional dynamics varied as a function of behavioral state during a memory  
22 task. Rats were exposed to a simple novel-object memory paradigm, likely sensitive to lesions  
23 in the hippocampal system (Buffalo et al., 1999; Mumby, 2001; Aggleton and Brown, 2006).  
24 Given that previous research has associated theta frequency oscillations with influence from  
25 the hippocampus (Buzsáki and Draguhn, 2004; Buzsáki, 2006), we investigated whether  
26 network structure reflected increased influence from theta signaling during any phase of  
27 memory processing. More generally, we developed a mix of novel data-mining and

1 hypothesis-driven network analyses to increase our understanding of the mechanisms of inter-  
2 regional connectivity.

3

#### 4 **METHODS**

5 Analysis was primarily carried out using custom written MATLAB code. ANOVA tests and  
6 some figure generation was carried out in R.

7

##### 8 *Experimental Design*

9 The experimental procedures have been described previously (Mishra et al., 2020). Briefly, all  
10 experimental procedures were performed in accordance with the EU directive on animal  
11 experimentation (2010/63/EU), and the Dutch nationally approved ethics project 2015-0129.  
12 All recordings were performed in the lab of MXC. We included five male Long-Evans TH:Cre  
13 rats (~3 months old, weight: 350-450 g at time of recordings). Non-overlapping findings from  
14 this dataset have been reported elsewhere (Mishra et al., 2020).

15

16 Electrophysiological recordings were collected from the PFC, STR, and VTA. There were 64  
17 contacts per region. For target recording locations see Figure 2a. 64 electrodes covered an  
18 area of 1 x 2 mm with typical spacing of 225  $\mu\text{m}$  in each shank and 330  $\mu\text{m}$  between shanks  
19 in PFC. STR electrodes also covered an area of 1 x 2 mm with the same shank distance (330  
20  $\mu\text{m}$ ). However, two shanks contained only tetrodes and two shanks had only single sites with  
21 typical spacing of 130  $\mu\text{m}$  between single sites and 660  $\mu\text{m}$  between tetrodes. VTA implants  
22 contained 8 shanks of 8 electrodes each and covered an area of 1.5 x 0.14 mm.

23

24 After habituation, each experimental session consisted of four conditions. First, animals were  
25 placed in an open field. Second, a novel object (e.g., a cup or toy) was presented in the middle  
26 of the box. Third, the animal was alone in the open field again. Fourth, the same object  
27 presented in the second condition was presented again. Each condition lasted between five  
28 and six minutes. We termed these conditions, baseline, encoding, consolidation, and retrieval,

1 respectively. Rats moved freely throughout experimental sessions. There was no delay  
2 between conditions. A camera was placed above the box to track movement (Figure 1a-c). A  
3 maximum of one session per animal was recorded on a single day. There were 28 recording  
4 sessions in total.

5

6 Using data from video recordings and DeepLabCut (Mathis et al., 2018), we created binary  
7 vectors indicating interaction with the object (during encoding and retrieval conditions) and  
8 movement. These were upsampled to 1000 Hz and aligned to LFP data.

9

10 *Statistical Analyses:*

11 *Calculating memory strength*

12 For each session, the percentage of time spent interacting with the object was calculated for  
13 the encoding and retrieval periods. The percentage during retrieval was subtracted from the  
14 percentage during encoding. Positive values indicate that the rat spent more time exploring  
15 the object when it was novel.

16

17 *Local field potential data cleaning*

18 Data were notch filtered to remove 50 Hz line noise, ICA filtering was done and components  
19 that appeared to capture muscle and line noise were removed, channels that appeared to be  
20 contaminated with noise by visual inspection were removed. Finally, cross-channel covariance  
21 matrices were calculated in 2000 ms windows in steps of 100 ms. A mean covariance matrix  
22 was calculated. Epochs whose covariance matrices were more than 2 standard deviations  
23 from the mean were discarded from further analysis. Distance between epoch and mean  
24 covariance matrices was measured using matrix Euclidean distance.

25

26 *Identifying intra-regional clusters*

27 Data were filtered using 42 logarithmically spaced central frequencies between 2 and 150 Hz.  
28 After filtering, data from novel and repeat object periods were limited to periods of interaction

1 with the object. Electrode X electrode correlation matrices were calculated in non-overlapping  
2 2.5s epochs. These epochs were averaged together to create a single electrode X electrode  
3 correlation matrix (Figure 3a). In addition, the average correlation matrix was calculated 20  
4 additional times with an evenly-spaced sliding window of 10% of the data left out from each  
5 average. These 20 partial averages were used for validation. This was done for each  
6 behavioral condition independently.

7

8 Clustering was done for each animal, condition, region, frequency, and validation fold  
9 independently. Before clustering, we first took the correlation coefficient of each row of the  
10 channel X channel matrix compared to each column of the matrix (Figure 3e-g). The resulting  
11 matrix was the same size as the input matrix, but now values in the matrix represented how  
12 the map of connectivity associated with one channel correlated with the map of connectivity  
13 associated with another channel (Liu et al., 2012). Finally, we took the squared Euclidean  
14 distance comparing each row to each column of the new matrix (Figure 3h). Squaring  
15 accentuates high similarities and forces all values to be positive, both of which facilitate  
16 clustering. This final matrix is referred to as the distance matrix.

17

18 The DBscan algorithm (Ester et al., 1996) was applied to distance matrices. The DBscan  
19 algorithm requires two input parameters: K and epsilon. Epsilon is the search radius around  
20 each point. K is the number of points that must be found within that radius in order for a given  
21 point to be considered a central point in a cluster. We chose the value of k to be constant at 8  
22 for all clustering. This was done for two reasons. First, Ester et al. (Ester et al., 1996) noted  
23 that cluster discovery is largely invariant to the choice of K within a reasonable range. Second,  
24 we tested all values of K between 2 and 22 and visual inspection of resulting silhouette values  
25 of clustering schemes suggested that k=8 was reasonable (Extended data 2-1).

26

27 The silhouette value is a measure both of how well a point fits into a particular cluster and how  
28 poorly it fits into any other cluster. A good cluster organization will yield clusters that maximize

1 the fit of all points to their respective clusters while minimizing the fits of points to other clusters  
2 (Rousseeuw, 1987; Tan et al., 2018).

3

4 Our choice for the epsilon value was set dynamically for each run of DBscan. To do this, the  
5 8-distance values were calculated. 8-distance refers to the minimum epsilon value needed in  
6 order to reach 8 points from a given point to be clustered. When all 8-distances in a data set  
7 are sorted and these values are plotted, natural divisions in the cluster structure of the data  
8 can be identified at points of sharp steepness in the 8-distance plot (Figure 3i). Algorithmic  
9 identification of sharp steepness was identified using the running difference between sorted  
10 8-distance values (Figure 3j). The running difference between sorted 8-distance values  
11 approximates the first derivative of the curve, so peaks in the plot correspond to points of  
12 maximum steepness in the 8-distance values. We identified the first peak above a threshold  
13 for each clustering run. The threshold was the mean of the running difference plus 2 standard  
14 deviations. Threshold calculation excluded the maximum value and the surrounding 5 points  
15 on either side. The epsilon value corresponding to the detected peak was used for clustering  
16 (see vertical and horizontal lines in panels i and j of Figure 3).

17

18 For each animal, condition, region, and frequency, clustering was performed on the correlation  
19 matrix calculated from the full recording and also on each of the 20 validation folds. Each  
20 cluster was examined across folds individually. For each fold, we asked what proportion of the  
21 channels in the cluster in the full data set were clustered together in the fold. We termed this  
22 value the agreement value. We further asked what proportion of the channels that were not a  
23 part of the cluster in the full data set were also given the same label as that which yielded the  
24 highest agreement value. We termed this value the outside value. The agreement value minus  
25 the outside value was termed the net agreement value, and clusters with an average net  
26 agreement value below .85 across folds were discarded as unstable (Figure 3d).

27

28 *Aggregating clusters*



1 Normalized mutual information (NMI) was calculated for all pairs of cluster schemes within  
2 each region using equation 3 from Strehl and Ghosh (Strehl and Ghosh, 2002). NMI yields a  
3 measure of the similarity between two cluster schemes of the same data. It is robust to  
4 differences in arbitrary labels (e.g. cyan vs. mauve in Figure 5d) and to missing data (e.g.  
5 unclustered white electrodes in Figure 5d). NMI ranges from 0 to 1. Values near 0 represent  
6 completely different clustering schemes where channels grouped into the same cluster in one  
7 scheme are in different clusters in another scheme. An NMI of 1 indicates an identical cluster  
8 scheme. NMI was calculated between cluster schemes from within the same condition. NMI  
9 values were averaged across conditions within each region, yielding a frequency X frequency  
10 matrix of cluster similarity for each region. Based on visual inspection of these matrices (Figure  
11 5a-c), we decided to break frequency up into 5 bands. The breakpoints for these bands were  
12 chosen by a greedy search algorithm. The algorithm began with 4 breakpoints spaced evenly  
13 across logarithmic frequency space. For each breakpoint, the average NMI within all frequency  
14 bands and between all frequency bands was calculated. The between-NMI was subtracted  
15 from the within-NMI. This net NMI value was calculated for all possible positions of the current  
16 breakpoint such that it was at least 3 frequencies away from the two breakpoints (or ends) on  
17 either side of it. The breakpoint was moved to the position with the maximum net NMI value.  
18 This loop was repeated until no breakpoint moves were made. While increasing the number  
19 of breakpoints from 3 to 4 markedly increased the final net NMI, only a marginal increase was  
20 found by increasing to 5, confirming the use of 4 breakpoints to create 5 frequency bands.

21  
22 Next, cluster schemes were aligned within each frequency band for each rat, condition, and  
23 region independently. We used equation 5 from Strehl and Ghosh (Strehl and Ghosh, 2002)  
24 to calculate the average NMI (aNMI) between a candidate cluster scheme and all cluster  
25 schemes within a frequency band. The initial candidate cluster scheme was chosen by  
26 selecting the input cluster scheme that had the highest aNMI with the other cluster schemes  
27 within its frequency band. The initial candidate scheme was relabeled to meet two constraints:  
28 (i)  $\lambda_1 = 1$ ; (ii) for all  $i = 1, \dots, n - 1$ :  $\lambda_{i+1} \leq \max_{j=1, \dots, i} (\lambda_j) + 1$  (Strehl and Ghosh, 2002). Here,  $\lambda$

1 represents the cluster label of the electrode indicated by the subscript. Next, the algorithm  
2 looped over electrodes. For each electrode, the aNMI of the whole scheme was calculated  
3 with the electrode in question having each of the possible cluster labels available in the  
4 scheme. If the aNMI was higher for some other label than the electrode had at the start of the  
5 loop, then the electrode's label was changed. Looping continued until no further changes were  
6 made. This yielded a single cluster scheme across the entire frequency band.

7

### 8 *Measuring changes in within-region functional structure*

9 aNMI was used to measure cluster similarity between conditions (within frequency) and  
10 between frequencies (within conditions). In both ways of doing the analysis, each rat was  
11 considered independently. In the between-conditions analysis, cluster schemes from all four  
12 conditions were considered for one region and one frequency at a time. For each of these four  
13 cluster schemes (one from each behavioral condition), the aNMI was calculated with respect  
14 to the other three conditions. On this metric, values near 0 would indicate that within a  
15 particular frequency band, the functional structure of a region observed during a particular  
16 condition was dramatically different from other conditions. By contrast, values near 1 would  
17 indicate a high degree of functional stability between conditions. The values obtained from  
18 individual rats were subjected to a within-subjects ANOVA with the factors frequency band  
19 and condition. For conditions, dummy variables encoding linear contrasts were used to  
20 compare baseline vs. consolidation, encoding vs. retrieval, and periods with objects (encoding  
21 and retrieval) vs. periods without objects (baseline and consolidation). For frequencies, linear  
22 contrasts were used to compare delta vs. others, theta vs. others, low gamma vs. others, and  
23 high gamma vs. others.

24

25 The between frequency analysis was similar. Cluster schemes from all five frequencies were  
26 considered for one region and one condition at a time. For each of these five cluster schemes  
27 (one from each frequency band), the aNMI was calculated with respect to the other four

1 conditions. Again, within-subjects ANOVA was used with the factors frequency band and  
2 condition. The same set of linear contrasts were used.

3

#### 4 *Measuring changes in between-region functional connections*

5 To facilitate measuring connections between regions, we used generalized  
6 eigendecomposition (GED) to reduce the signals from electrodes within each cluster to a  
7 single time series. The goal of GED is to identify a component, defined as a weighted  
8 combination of the channel time series from within each cluster, that maximizes the power of  
9 narrowband activity to broadband activity:

$$10 \quad \operatorname{argmax} \frac{\|w^T X\|^2}{\|w^T Y\|^2}$$

11 Where  $\mathbf{X}$  is the narrowband-filtered data,  $\mathbf{Y}$  is the broadband data, and  $\mathbf{w}$  is the vector of  
12 channel weights. The solution to this optimization can be obtained from the GED on two  
13 covariance matrices:  $\mathbf{S}=\mathbf{X}\mathbf{X}^T$  and  $\mathbf{R}=\mathbf{Y}\mathbf{Y}^T$  (Parra et al., 2005; Cohen, 2021):

$$14 \quad \mathbf{S}\mathbf{W} = \mathbf{R}\mathbf{W}\mathbf{\Lambda}$$

15  $\mathbf{W}$  is the square matrix of eigenvectors, and  $\mathbf{\Lambda}$  is the diagonal matrix of eigenvalues. After  
16 solving the GED for each cluster, the eigenvector associated with the largest eigenvalue was  
17 used to calculate a weighted combination of the narrowband signals from the cluster resulting  
18 in a single time series for each cluster that explained the maximum amount of variance  
19 between the electrodes. The largest eigenvalue was divided by the sum of all eigenvalues in  
20 order to estimate the proportion of variance explained by the single time series (Figure 4f).

21

22 Connectivity between cluster time series was assessed using amplitude envelope correlations  
23 (Bruns et al., 2000). Time series were transformed into amplitude envelopes by taking the  
24 absolute value of the Hilbert transform. For every pair of cluster time series within a given rat  
25 and condition, correlations were calculated in non-overlapping 2.5 second windows. Windows  
26 with a correlation greater than 2 standard deviations from the mean were ignored. The  
27 remaining correlations were averaged together to obtain a connectivity strength for the pair of

1 clusters. To assess the significance of these connectivity strength values, the same amplitude  
2 envelope correlation analysis was carried out again with one of the time series offset such that  
3 the last X data points in the time series were cut from the end and placed at the beginning of  
4 the series where X was a random value. This recalculation was carried out 1000 times for  
5 each pair of connections. Connections whose original correlation was stronger than 950 or  
6 more of the comparison correlations were deemed significant.

7

8 For graph-theoretic measurements, each cluster was treated as a node and significant  
9 connections were treated as weighted edges. Strength, betweenness centrality, clustering  
10 coefficient, and average path length were calculated using functions from the Brain  
11 Connectivity Toolbox (Rubinov and Sporns, 2010). These measures were combined across  
12 rats within each condition and sorted by strength (Figure 7l-o). The total strength within each  
13 combination of frequency band and region was summed and plotted as a heatmap for each  
14 condition (Figure 7p-s). Summed strength values were submitted to a series of within-subject  
15 ANOVAs with frequency band, region, and condition as factors. ANOVAs compared two  
16 conditions at a time: baseline vs. encoding, baseline vs. consolidation, baseline vs. retrieval.  
17 t-tests were used to assess changes in total strength in the delta and theta frequency bands.

18

19 To visualize connectivity maps, connections were pooled across animals. First, we took each  
20 rat's strongest significant connection between pairs of regions and frequency bands. Because  
21 of a limited number of significant connections involving high gamma, low and high gamma  
22 were combined for this analysis. Next, for connections that were significant for at least 4/5  
23 animals, the median connectivity strength across rats was calculated. This resulted in a group  
24 connectivity matrix that was 12 X 12 (3 regions X 4 frequency bands). For display, these  
25 connections were plotted on a schematic of the rat brain using line thickness to indicate  
26 connectivity strength (Figure 7a-d). In addition, the group 12 X 12 connectivity matrix for the  
27 baseline period was used as a reference, and plots were generated to display the subset of  
28 connections that increased in strength relative to baseline (Figure 7f-h) and decreased relative

1 to baseline (Figure 7i-k). Finally, the mean connectivity strength relative to baseline was also  
2 calculated between nodes within each frequency band (Figure 7e), and these relative changes  
3 in connectivity strength were compared to 0 using t-tests.

4  
5 We examined the relationship between connectivity strength and memory strength. To do this,  
6 amplitude envelope correlations were calculated on an individual session basis for  
7 connections that were significant in the group (significant at the individual level for 4/5 rats).  
8 The mean of these session-wise connectivity values was taken for each animal. In addition,  
9 each animal's mean memory strength was calculated by taking the mean of its individual  
10 session memory strengths. Sessions with memory strength more than 2 standard deviations  
11 from the mean were discarded from this analysis (2/28 recording sessions). Correlations were  
12 calculated between mean memory strengths and mean connectivity strengths. This analysis  
13 yielded similar results when sessions were kept separate and correlations were calculated  
14 across all 26 sessions (after removal of 2 outlier sessions).

15  
16 Finally, we repeated the generation of pooled connectivity maps treating each region as a  
17 single large cluster. The same band divisions that were used in the main clustering analysis  
18 were used here. The goal of this analysis was to see whether similar connectivity patterns  
19 would be discovered if the clustering process was skipped.

20

#### 21 Data availability statement

22 The data that support the findings of this study are available from the corresponding author  
23 upon reasonable request.

24

#### 25 Code accessibility

26 Key custom functions are available on Github  
27 (<https://github.com/adede1988/subNetworkDynamics.git>). Full processing and analysis code  
28 is available from the corresponding author upon reasonable request.

1  
2  
3  
4  
5  
6  
7  
8  
9  
10  
11  
12  
13  
14  
15  
16  
17  
18  
19  
20  
21  
22  
23  
24  
25  
26  
27  
28

## RESULTS

### *Behavior*

Animals were serially exposed to (1) an empty open field, (2) the same open field with a novel object, (3) the empty open field again, and finally (4) the open field with the same object. These conditions were termed baseline, encoding, consolidation, and retrieval, respectively (Figure 1c). During the baseline and consolidation periods, rats tended to sit still (85% and 93% of the time, respectively; Figure 1f). During the encoding and retrieval periods, rats rested for somewhat less time (84% and 90% of the time, respectively). Rats spent more time interacting with the object in the encoding than retrieval period (16% vs. 9%, respectively), and subtracting the percent of time spent interacting with the object during the retrieval period from the corresponding percentage during the encoding period yielded a significant difference (after removal of outliers more than 2 SDs below mean  $t(25)=4$ ;  $p<.001$ ; Figure 1e).

### *Local Field Potential Power Effects*

We calculated power spectra averaged across time and electrode for each behavioral condition and each brain region (Figure 2b-g). Repeated measures t-tests were used to compare each condition to baseline for each frequency individually. In general, spectral dynamics in all three regions were characterized by a 1/f-like decrease in power with increasing frequency, and a peak in the theta range (5-10 Hz). The only reliable difference in the spectral profiles between behavioral conditions was a relative increase in power around 4 Hz in the STR during the encoding phase.

Closer inspection of the individual power spectra per electrode revealed considerable inter-electrode variability (Figure 2h-m). This suggests that the multielectrode arrays may have spanned multiple functionally distinct neural networks. We therefore proceeded to identify clusters of electrodes based on inter-electrode correlation matrices.

1

## 2 *Identification of intra-regional clusters*

3 We identified clusters of channels based on similar patterns of inter-channel correlations of  
4 their LFP time series, which were identified using the DBscan algorithm.(Ester et al., 1996)  
5 The clustering method was applied separately per animal, brain region, task condition, and  
6 narrowband frequency between 2 and 150 Hz, and the robustness of clusters was confirmed  
7 using 20-fold cross-validation (see Methods for details and Figure 3). Correlation matrices had  
8 strong block-diagonal patterns both between- and within-region, and these patterns were  
9 successfully detected and emphasized using clustering analysis (Figure 3a-b). Most clusters  
10 exhibited high silhouette values (Rousseeuw, 1987)(Figure 2n). Across animals, there was a  
11 similar number of clusters detected for each condition (range 270-283 clusters over all  
12 frequencies), and the number of clusters per condition did not vary widely between animals  
13 (range 250-285). However, not all clusters survived 20-fold validity testing.

14

## 15 *Cluster Validity and descriptive statistics*

16 To ensure cluster validity, we assessed clusters in 20 validation folds. For each fold, we  
17 repeated the clustering analysis using only 90% of the data. Clusters that were not at least  
18 85% consistent across folds were discarded as unstable (see methods). This procedure led  
19 to the elimination of 13.8% of clusters. Although we did not explicitly use silhouette values as  
20 a criterion for thresholding, eliminated clusters had lower average silhouette values than  
21 accepted clusters (Figure 3d and n). After validation, there was still no marked difference in  
22 clusters per condition (range 229-247), but rat 1 exhibited fewer stable clusters than other  
23 animals (rat 1: 199; range excluding rat 1: 238-261). The group average number of clusters  
24 summed over conditions and frequencies was not markedly different across regions (PFC: 77;  
25 STR: 76; VTA: 85.6).

26

27 Considering the narrowband signals used for clustering, the Pearson  $\rho$  values comparing  
28 channels within the same cluster were higher than those obtained when comparing channels

1 from different clusters or that were unclustered (t-test on animal means:  $t(8)=10.7$ ;  $p<.001$ ;  
2 Figure 4a). The mean  $\rho$  value within clusters was .38, and the mean value between clusters  
3 was -.11. For 97% of cases, the average within cluster correlation was larger than the average  
4 between cluster correlation (Figure 4b). For each animal X condition X region X frequency,  
5 1000 random cluster schemes were chosen with the same number of clusters and the same  
6 number of channels per cluster as those detected in our main analysis. Randomly chosen  
7 clusters did not exhibit a difference for within versus between cluster channel time-series  
8 correlations (Figures 4c-d).

9  
10 The high correlation between channels within clusters suggested that clustering successfully  
11 detected groups of electrodes influenced by the same signal. To explore this further, we  
12 calculated the variance in power between channels within each cluster divided by the variance  
13 in power between all channels within each cluster's region (Figure 4e). For random samples  
14 from a normal distribution, variance is insensitive to sample size, so this ratio would be  
15 expected to equal 1. Indeed, for randomly chosen clusters with the same frequency, region,  
16 and channel count characteristics as those observed, the average value for this ratio was 0.99.  
17 However, for observed clusters, the average value for this ratio was 0.83. The distributions of  
18 these power variance ratios were different (Two-sample Kolmogorov-Smirnov test:  $D=.24$ ;  
19  $p<<.001$ ). We also found that a sizable percent of the variance between channels within each  
20 cluster could be explained by a single generalized eigendecomposition (GED) component  
21 (group average between 13% and 17% across frequencies; Figure 4f). Interestingly, there was  
22 a visually apparent local maximum in variance explained by the first GED component in the  
23 theta range (6-10 Hz).

24  
25 Finally, the number of channels in any given cluster tended to be lower at higher frequencies,  
26 and correspondingly the number of clusters detected tended to be higher at higher frequencies  
27 (Figure 4g;  $\rho=-.72$ ;  $p<<.001$ ). This pattern suggests that the anatomical organization of higher  
28 frequency signals is more locally differentiated than that of low frequency signals.



1

## 2 *Aggregating clusters*

3 In total, this procedure yielded a mean of 238.4 statistically reliable clusters per condition  
4 across animals. Visual inspection of electrode groupings revealed that clusters were largely  
5 stable across wide ranges of frequencies (e.g. Figure 5d). To assess this stability  
6 quantitatively, we calculated the normalized mutual information (NMI)(Strehl and Ghosh,  
7 2002) between cluster schemes at different frequencies and averaged the resulting NMI matrix  
8 across conditions and animals for each region (Figure 5A-C). Based on NMI, we utilized a  
9 greedy optimization algorithm to select divisions between frequency bands that maximized  
10 average NMI (aNMI) within bands and minimized aNMI between bands. We divided the  
11 frequency space into 5 bands for each region (dashed lines in Figure 5A-C; see methods).  
12 Remarkably, despite the algorithm being applied separately per region and without a priori  
13 constraints regarding the size or spectral extent of clusters, the resulting frequency bands  
14 were similar across regions and corresponded to canonical frequency bands. In the PFC and  
15 STR the clusters mapped onto canonical delta, theta, beta, low gamma and high gamma  
16 (Figure 5A-B). By contrast, in the VTA there was a separate band for alpha, and beta was  
17 combined with low gamma (Figure 5C). For ease of explanation, the same band labels will be  
18 used throughout the text (Table 1).

19

20 Next, information from different cluster schemes within each band was used to create a single  
21 cluster scheme within each band for each animal, condition, and region. To do this, we again  
22 used a greedy optimization algorithm. This time, the algorithm selected a cluster scheme that  
23 maximized the aNMI calculated across the cluster schemes within each band (Figure 5d-  
24 e).(Strehl and Ghosh, 2002) This procedure resulted in an average of 31.5 clusters per animal  
25 in each condition.

26

## 27 *Changes in within-region functional structure*

1 Clusters were detected independently within-frequency and within-condition, and the steep  
2 drop-off in aNMI values away from the diagonals in Figures 5a-c indicates that cluster  
3 schemes were different in different frequency bands. To quantify cluster organization similarity  
4 across behavioral conditions and frequencies, we calculated the aNMI between pairs of cluster  
5 schemes detected either within a single frequency band but between different behavioral  
6 conditions (Figure 6a-f), or within a single condition but between different frequency bands  
7 (Figure 6g-m). An aNMI near 1 indicates that network structure is very stable across either  
8 frequency or condition, and an aNMI near 0 indicates that network structure is very different  
9 across either frequency or condition.

10

11 In general, aNMI values were higher than would be expected by chance, but also consistently  
12 below 1, meaning that internal network structure in the PFC, STR, and VTA was neither  
13 completely remapped or completely stable either when looked at across different conditions  
14 (Figure 6a-f) or across different frequencies (Figure 6g-m). More specifically, for every paired  
15 combination of animal, condition, region, and frequency, we generated 1000 random pairs of  
16 cluster schemes where the total number of channels, the number of clusters, and the number  
17 of channels per cluster were held constant. aNMI between these pairs was calculated. The  
18 99th percentile of these random distributions is plotted in Figure 6 (dashed lines). Random  
19 restructuring led to a maximum aNMI of about 0.2 across all situations. Yet, we observed aNMI  
20 values that were consistently higher than this.

21

22 To examine remapping between different conditions we calculated the aNMI of cluster  
23 schemes within frequency between different conditions. Separately for each condition, this  
24 analysis captures the average similarity of a condition with the other three conditions while  
25 holding frequency constant. For example, considering only clusters observed in the delta band  
26 in the VTA and averaging across animals, the NMI of the cluster organization observed during  
27 consolidation had similarities of 0.51, 0.25, and 0.35 with the clusters observed during  
28 baseline, encoding, and retrieval, respectively. Averaging these three values yielded 0.37

1 which is displayed in Figure 6e. aNMI values were submitted to a 5 (frequency bands) X 4  
2 (conditions) within subjects ANOVA for each region (the ANOVA numerical data are presented  
3 in Extended data Figure 6-1; here we highlight only the relevant significant results). In the PFC  
4 there was a main effect of frequency (Figure 6a-b). Visual inspection of Figure 6a indicated  
5 that this effect was driven by reduced cross-condition stability in high gamma, and this was  
6 confirmed by linear contrast. But it appears that a small number of data points drove the effect  
7 (Figure 6b). In the STR there was also a main effect of frequency (Figure 6c-d), and this was  
8 driven by relatively high stability in the low gamma band (Figure 6d) as well as low stability in  
9 the theta band (not shown). The effects in the PFC and STR were relatively modest ( $\eta^2 < .2$ ).  
10 By contrast, the VTA exhibited dramatic remapping of its cluster structure in the delta band  
11 (Figure 6e-f;  $\eta^2 = .48$ ). Taken together, the STR was generally stable across conditions in all  
12 frequency bands. The PFC exhibited moderate restructuring of its cluster structure in the high  
13 gamma band, and the VTA restructured dramatically across behavioral states, but this  
14 restructuring was limited to delta band signaling.

15

16 To examine independence between different frequencies we again used aNMI. Separately for  
17 each frequency, this analysis captures the average similarity of cluster organization in one  
18 frequency band with the other four frequency bands while holding condition constant. These  
19 aNMI values were submitted to a 5 (frequency bands) X 4 (conditions) within subjects ANOVA  
20 for each region (for ANOVA table see Extended data Figure 6-2). In the PFC there were main  
21 effects of both frequency and condition (Figure 6g-i). These effects were driven by lower cross-  
22 frequency cluster scheme similarity in behavioral periods with an object present (both  
23 encoding and retrieval; Figure 6h) and lower cross frequency similarity in the cluster structure  
24 of high gamma signaling relative to other frequency bands (Figure 6i). There were no  
25 significant effects in the STR (Figure 6j). In the VTA there were main effects of both frequency  
26 and condition (Figure 6k-m). As in the PFC, behavioral periods with objects had lower cross-  
27 frequency cluster structure similarity than those without an object (Figure 6l). Also similar to  
28 the PFC, the cluster scheme for high gamma was dissimilar from the cluster schemes of other

1 frequency bands. In addition, and unlike the PFC, the cluster structure of delta signaling was  
2 dissimilar to other frequency bands in the VTA (Figure 6m).

3

4 Taking these two analysis approaches together, PFC high gamma and VTA delta exhibited  
5 significant changes in cluster schemes. This indicates that these areas remap their internal  
6 structures with respect to signalling in these frequency bands across conditions (For single  
7 animal example see Figure 6q) and that the physical layout of signaling in these frequency  
8 bands is different from other frequency bands (for single animal example see Figure 6o).  
9 Furthermore, both regions exhibit more cross-frequency dissimilarity in the object periods,  
10 suggesting a greater degree of functional segregation between frequency-specific signal  
11 generators during object interaction. By contrast, the STR exhibited relatively high stability  
12 across conditions (for single animal example see Figure 6p). Finally, it is clear from visual  
13 examination of Figure 6 that cluster structures are generally more differentiated between  
14 different frequencies than across different conditions, suggesting independence of the neural  
15 substrates supporting signaling in different frequency bands. Averaging across animals,  
16 conditions, regions, and frequencies, within frequency aNMI values had a mean of .82 (Figure  
17 6a-f), but within condition aNMI values had a mean of .68 (Figure 6g-m)( $p < .001$ ; CI: .12-.16;  
18 see histogram in Figure 6n). That said, it should be emphasized that the most striking intra-  
19 regional cluster differences were observed within the delta frequency band in the VTA,  
20 suggesting that this structure remapped dramatically with respect to delta-band signal  
21 generation.

22

### 23 *Between-region network structure*

24 As mentioned above, using GED to reduce the dimensionality of cluster signals to a single  
25 time course generally yielded a component that explained a sizable portion of the variance  
26 between channels (Figure 4f). After converting each cluster into a single time course, we  
27 examined connectivity between clusters using amplitude envelope correlations (Bruns et al.,  
28 2000). A bootstrapped null distribution was constructed for each connection (see methods).

1 Correlations were considered significant if they were stronger than 95% of their corresponding  
2 null correlations. The results of this procedure can be thought of as connectivity graphs for  
3 each animal in each condition. In these graphs, each node was a cluster with a specific region  
4 and frequency band, and edges were the correlations between nodes. Because there were  
5 often multiple clusters with the same region and frequency band, animals could sometimes  
6 have multiple connections along the same edge. In order to aggregate connections across  
7 animals, the strongest significant correlation between each frequency, region pair was taken  
8 for each animal. Any edge that did not have at least one significant connection for 4/5 rats was  
9 discarded. The medians of these maximum connection strengths across animals in each  
10 condition are plotted in Figure 7a-d. There were few significant connections including high  
11 gamma, so these connections were grouped with low gamma for this analysis. In general, the  
12 pattern of connectivity was dense in the baseline period, with 72% of all possible connections  
13 exhibiting significant coupling. Connectivity dropped during the encoding period, with 2% of all  
14 possible connections exhibiting significant strength. Connectivity then rebounded in the  
15 consolidation period to 52%, and then fell again during the retrieval period to 18%. In addition,  
16 while PFC delta was the node with the highest betweenness centrality in the first three  
17 behavioral conditions, PFC theta became the node with highest betweenness in the retrieval  
18 period (dot size in Figure 7a-d).

19  
20 In order to unpack these results further, we replotted the connectivity as a function of change  
21 relative to connectivity strength during baseline (Figure 7f-h for increases; 7i-k for decreases).  
22 In general, connections in the theta band strengthened marginally during the consolidation  
23 and retrieval periods (Figure 7e;  $p$ 's<.07). In addition, there was also beta band connection  
24 strengthening in the consolidation period ( $p$ =.0503). In the retrieval period, a complex pattern  
25 of high frequency interactions involving the beta and gamma bands emerged (Figure 7h).  
26 Interestingly, decreases in specific delta band connections between regions were observed in  
27 all three conditions, but these were not significant in the aggregate (Figure 7e).

28

1 To check whether the aggregating process had biased the results, we performed an analysis  
2 of graph theoretic descriptive statistics on the full cluster X cluster connectivity matrices of  
3 significant connections derived for each rat. In general, nodes with high strength also had high  
4 betweenness, high clustering coefficients, and low path lengths (Figure 7l-o). We summed the  
5 strength of all clusters within each region and frequency band (Figure 7p-s). The results  
6 observed in the aggregated graphs were recapitulated. Overall strength reduced markedly in  
7 the object periods relative to the non-object periods. In addition, while strength was  
8 concentrated in the delta band during baseline (Figure 7p), theta band connections exhibited  
9 the most strength during the consolidation period (Figure 7r). These results were confirmed  
10 with a series of within-subject ANOVAs comparing pairs of conditions using frequency band,  
11 condition, and region as factors (for full ANOVA tables see Extended data Figures 7-1 to 7-3).  
12 Confirming the overall drop in strength during the encoding and retrieval periods, there was a  
13 main effect of condition in comparisons between baseline and encoding and between baseline  
14 and retrieval ( $F_{s(1,281)} > 114$ ;  $p < <.001$ ), but this main effect was absent when comparing  
15 baseline to consolidation ( $p = .8$ ). Confirming the shift from delta to theta strength, there was  
16 an interaction between condition and frequency for comparisons between baseline and all  
17 three other conditions ( $F_{s(4,281)} > 8.8$ ;  $p < <.001$ ). Planned comparisons targeted at examining  
18 changes in relative delta/theta strength found that delta band connections were weaker in the  
19 consolidation period relative to baseline ( $t(58) = -3.3$ ;  $p = .002$ ), and connection strength in the  
20 theta band was marginally increased during the consolidation period relative to baseline  
21 ( $t(60) = 1.9$ ;  $p = .055$ ).

22

23 We considered whether inter-regional connections played a role in memory. To test for this,  
24 connectivity strength of all significant connections was calculated for each session  
25 independently. Memory strength for each session was assessed as shown in Figure 1e. For  
26 each animal, we took the mean connection strength and memory strength values across  
27 sessions and then calculated the correlation between these values. Interestingly, during the  
28 consolidation period, theta connections between the VTA and STR and between the VTA and

1 PFC were significantly correlated with memory ( $p$ 's<.05; Extended data Figure 7-1). However,  
2 a correlation analysis with only 5 animals should be interpreted with an appropriate amount of  
3 caution.

4  
5 Finally, to check whether clustering had meaningfully contributed to our network connectivity  
6 findings at all, we repeated the GED and connectivity analysis considering entire regions as  
7 singular clusters (Extended data Figure 7-2). In general, this analysis found markedly fewer  
8 significant connections. In particular, only 3 connections were found in the retrieval period  
9 when entire regions were considered, compared to 26 connections observed using clusters.  
10 In other words, segregating the intra-regional activity into clusters was crucial to uncovering  
11 the memory-related functional dynamics.

## 12 13 **DISCUSSION**

14  
15 Rats spent less time exploring previously encountered compared to novel objects (Figure 1),  
16 and this memory effect was associated with a complex and dynamic pattern of inter-regional  
17 functional connectivity (Figure 7). At baseline, we observed that the STR, PFC, and VTA were  
18 robustly coherent across multiple frequency bands, with delta oscillations playing an outsized  
19 role. There was a dramatic pruning of network connectivity when rats were exposed to a novel  
20 object. After the novel object was removed, connectivity rebounded, but the connectivity profile  
21 shifted away from being dominated by delta towards being dominated by theta. Finally, when  
22 animals were re-exposed to objects, connections were not as severely reduced as they had  
23 been during initial presentation, and specifically theta and higher-frequency connections were  
24 stronger than they had been during the novel object encoding period. Underlying these inter-  
25 regional changes, functional organization of gamma frequency signals in the PFC and both  
26 gamma and delta signals in the VTA all changed markedly across behavioral conditions.

27



1 It is important to appreciate that these patterns were detectable only with the use of sub-  
2 regional clustering analysis (supplemental Figure 3). Although there was considerable  
3 variability in the signals recorded at different electrodes (Figure 2), we found that sub-regional  
4 clusters of electrodes were stable across multiple sessions recorded on different days. These  
5 clusters were verified using 20-fold validation, silhouette value examination (Figure 3), and by  
6 comparing the statistics of observed clusters to those of randomly chosen clusters (Figure 4).  
7 In general, clusters covered between a quarter and a third of the space of our electrode arrays  
8 (mean cluster size 18-24 electrodes; Figure 4g). Thus, for the STR and PFC, clusters covered  
9 an area of approximately half a square millimeter, and in the VTA they covered less than a  
10 tenth of a square millimeter. These areas are smaller than the traditional demarcations  
11 between architectonically categorized brain regions (Paxinos and Watson, 2006). This  
12 highlights the rich pattern of fine-grained spatiotemporal dynamics that can be discovered only  
13 through large-scale recordings and multivariate data analyses.

14  
15 The idea that such small areas could act as functionally important units in long distance  
16 patterns of connectivity is consistent with principles of anatomy: Anatomical tract tracing  
17 studies have often found exquisite patterns such that regions lying only a single millimeter  
18 apart can have dramatically different profiles of connectivity (Schmahmann and Pandya,  
19 2006), and the patterns of connectivity between our three recording targets are no exception  
20 (Prensa and Parent, 2001; Gabbott et al., 2005; Geisler and Zahm, 2005; Hoover and Vertes,  
21 2007). Recent work has begun to reveal the functional importance of highly specific anatomy.  
22 For example, in rodents, specific fiber pathways are independently responsible for dopamine-  
23 dependent learning about novel objects and social stimuli in the VTA (Gunaydin et al., 2014).  
24 In monkeys, connectivity between small cortical patches supports face perception (Grimaldi  
25 et al., 2016; Chang and Tsao, 2017; Moeller et al., 2017). In humans, distinct subfields within  
26 the VTA are important for novelty and reward detection, and each of these subfields exhibits  
27 a unique pattern of functional connectivity (Krebs et al., 2011). The present results help to  
28 generalize these findings further, showing how sub-regional patches of brain tissue form



1 changing patterns of long-distance connectivity during novel-object memory encoding,  
2 consolidation, and retrieval.

3

4 In addition, we observed that signals at different temporal frequencies and signals measured  
5 during different behavioral conditions both had distinct cluster topographies (Figure 6). This  
6 suggests that frequency-specific signal generators are anatomically localized and can be  
7 activated or deactivated depending on task demands, resulting in a constantly shifting  
8 landscape of functional anatomy. This finding also builds on earlier work. For example, in  
9 humans the BOLD activation associated with semantic concepts changes across the entire  
10 cortical mantle in response to attentional goals (Çukur et al., 2013), and nodes of the default  
11 mode network become less connected during cognitively engaging tasks (Raichle, 2015).  
12 More generally, Honey et al. (Honey et al., 2007) used a computational model of biologically  
13 inspired brain signals and known anatomical connectivity of the macaque brain to simulate  
14 electrophysiology data. They found that functional connectivity simulated over a long time  
15 window (minutes) recapitulated patterns of anatomical connectivity, but on shorter time scales  
16 (seconds or less) patterns of functional connectivity deviated from the model's set anatomy.  
17 The authors interpreted this finding to mean that the brain is capable of dynamically changing  
18 its functional connectivity in ways that would not be predicted from anatomy alone, and our  
19 results confirm this interpretation. However, Honey et al. (Honey et al., 2007) reported that  
20 functional connectivity exhibits regression towards the mean over relatively short periods of  
21 time (10s of seconds). By contrast, we observed sustained periods with dramatically different  
22 cluster structures and long-distance connectivity, implying that both local and global network  
23 states can be held far from any equilibrium for at least several minutes in response to  
24 environment/task changes. As discussed in Honey et al. (Honey et al., 2007), computational  
25 modelling efforts with explicit consideration of context may capture this phenomenon.

26

27 Examining the specific pattern of connectivity changes exhibited in the present results, the  
28 lack of inter-regional connectivity during the encoding period is striking (Figure 7b and q). This

1 result is surprising considering the vigorous novelty response produced by dopamine neurons  
2 of the VTA in both cats and monkeys (Ljungberg et al., 1992; Horvitz et al., 1997), and the  
3 finding that dopamine antagonists can impair memory in rodents (O'Carroll et al., 2006). In  
4 humans, dopaminergic single-unit firing in the substantia nigra has been shown to predict  
5 subsequent memory for novel stimuli (Kaminski et al., 2018). The seeming paradox of the  
6 known importance of DA in memory formation, juxtaposed with our observation of a  
7 disconnected VTA, could be explained by a connection between the VTA and an area that we  
8 did not record from. Much work has implicated the interaction between the HPC and VTA in  
9 response to novelty and memory encoding (Otmakhova et al., 2013). For example, fMRI data  
10 have revealed a novelty signal in the VTA associated with connectivity to the HPC, nucleus  
11 accumbens, and V1 (Krebs et al., 2011). The primary role for the HPC in the early stage of  
12 novelty encoding is further supported by faster neural response times for memory-predicting  
13 firing in the HPC compared with the substantia nigra in humans (Kaminski et al., 2018). Our  
14 data extend this finding by showing that other connections involving the VTA and important  
15 memory structures are suppressed during novelty encoding, heightening the importance of  
16 any HPC-VTA connection.

17

18 A second point of interest was the shift from delta (~4 Hz) connectivity during the baseline  
19 period to theta (~8 Hz) connectivity during the consolidation and retrieval periods (Figure 7e,p  
20 and r). There have been many reports highlighting coherent theta oscillations linking the HPC  
21 and PFC during declarative memory tasks (Benchenane et al., 2010; Otmakhova et al., 2013;  
22 Rajasethupathy et al., 2015; Kafkas and Montaldi, 2018; Kaminski et al., 2018), and putative  
23 DA cells in the midbrain of humans exhibit spiking coherence with PFC theta that is memory-  
24 dependent (Kaminski et al., 2018). By contrast, during a stimulus-response association task,  
25 delta frequency synchrony between the HPC, PFC, and VTA was interpreted as influence from  
26 the STR (Fujisawa and Buzsaki, 2011). This interpretation was based on prior observations of  
27 delta oscillations in the STR during this type of task. Where Fujisawa and Buzsaki (Fujisawa  
28 and Buzsaki, 2011) demonstrated that the HPC can be influenced by delta oscillations in a

1 network involving the PFC and the VTA, our data demonstrate the reverse: the STR can be  
2 influenced by theta oscillations in a network involving the PFC and the VTA. We even  
3 observed some evidence that the theta connection between the VTA and the other two  
4 structures during consolidation was related to our behavioral measure of memory (Extended  
5 data Figure 7-1). Intriguingly, the largest changes in intra-regional cluster organization were  
6 observed for delta signaling in the VTA (Figure 6e). These changes may represent a state  
7 shift in the VTA from a delta- to a theta-influenced state. Indeed, it has recently been observed  
8 that theta and delta oscillatory modes in the HPC are orthogonal (Schultheiss et al., 2019),  
9 and our results indicate that these oscillatory modes may represent different network states  
10 beyond the HPC as well.

11

12 Finally, we observed a complex pattern of higher frequency connections during the retrieval  
13 period that were not present during the encoding period. It is widely accepted that memory  
14 retrieval involves a network of activation, and this is particularly true of old memories (Dede  
15 and Smith, 2018). Our data indicate that some network connections needed to support  
16 retrieval can be formed within minutes of initial encoding.

17

18 Three major limitations of this study are the need to relate the local clustering and global  
19 connectivity to single-unit firing, our lack of measurement of potentially involved structures  
20 beyond the STR, VTA, and PFC (primarily the hippocampus), and the need for more robust  
21 behavioral tests of memory. We believe these areas present important avenues for future work  
22 to extend the results presented here.

23

24

25 Bibliography

26 Aggleton JP, Brown MW (2006) Interleaving brain systems for episodic and recognition  
27 memory. *Trends Cogn Sci (Regul Ed)* 10:455–463.

- 1 Beeler JA, Kisbye Dreyer J (2019) Synchronicity: The Role of Midbrain Dopamine in Whole-  
2 Brain Coordination. *eNeuro* 6.
- 3 Benchenane K, Peyrache A, Khamassi M, Tierney PL, Gioanni Y, Battaglia FP, Wiener SI  
4 (2010) Coherent theta oscillations and reorganization of spike timing in the  
5 hippocampal- prefrontal network upon learning. *Neuron* 66:921–936.
- 6 Bruns A, Eckhorn R, Jokeit H, Ebner A (2000) Amplitude envelope correlation detects  
7 coupling among incoherent brain signals. *Neuroreport* 11:1509–1514.
- 8 Buffalo EA, Ramus SJ, Clark RE, Teng E, Squire LR, Zola SM (1999) Dissociation between  
9 the effects of damage to perirhinal cortex and area TE. *Learn Mem* 6:572–599.
- 10 Buzsáki G, Draguhn A (2004) Neuronal oscillations in cortical networks. *Science* 304:1926–  
11 1929.
- 12 Buzsáki G (2006) *Rhythms of the Brain*. Oxford University Press.
- 13 Chang L, Tsao DY (2017) The code for facial identity in the primate brain. *Cell* 169:1013-  
14 1028.e14.
- 15 Cohen MX (2021) A tutorial on generalized eigendecomposition for source separation in  
16 multichannel electrophysiology ( [arXiv:2104.12356v2](#)).
- 17 Constantinidis C, Procyk E (2004) The primate working memory networks. *Cogn Affect*  
18 *Behav Neurosci* 4:444–465.
- 19 Costa RM, Lin S-C, Sotnikova TD, Cyr M, Gainetdinov RR, Caron MG, Nicolelis MAL (2006)  
20 Rapid alterations in corticostriatal ensemble coordination during acute dopamine-  
21 dependent motor dysfunction. *Neuron* 52:359–369.
- 22 Çukur T, Nishimoto S, Huth AG, Gallant JL (2013) Attention during natural vision warps  
23 semantic representation across the human brain. *Nat Neurosci* 16:763–770.
- 24 Dede AJO, Smith CN (2018) The functional and structural neuroanatomy of systems  
25 consolidation for autobiographical and semantic memory. *Curr Top Behav Neurosci*

- 1        37:119–150.
- 2        Dejean C, Nadjar A, Le Moine C, Bioulac B, Gross CE, Boraud T (2012) Evolution of the  
3        dynamic properties of the cortex-basal ganglia network after dopaminergic depletion in  
4        rats. *Neurobiol Dis* 46:402–413.
- 5        Ester M, Kriegel H-P, Sander J, Xu X (1996) A Density-Based Algorithm for Discovering  
6        Clusters in Large Spatial Databases with Noise. *Proc 2nd Int Conf on knowledge  
7        discovery and data mining* 2:226–231.
- 8        Freedberg M, Toader AC, Wassermann EM, Voss JL (2020) Competitive and cooperative  
9        interactions between medial temporal and striatal learning systems. *Neuropsychologia*  
10       136:107257.
- 11       Fujisawa S, Buzsaki G (2011) A 4hz oscillation adaptively synchronizes prefrontal, VTA, and  
12       hippocampal activities. *Neuron* 72:153–165.
- 13       Gabbott PLA, Warner TA, Jays PRL, Salway P, Busby SJ (2005) Prefrontal cortex in the rat:  
14       projections to subcortical autonomic, motor, and limbic centers. *J Comp Neurol*  
15       492:145–177.
- 16       Geisler S, Zahm DS (2005) Afferents of the ventral tegmental area in the rat-anatomical  
17       substratum for integrative functions. *J Comp Neurol* 490:270–294.
- 18       Grimaldi P, Kadharbatcha SS, Tsao D (2016) Anatomical Connections of the Functionally  
19       Defined “Face Patches” in the Macaque Monkey. *Neuron* 90:1325–1342.
- 20       Gunaydin LA, Grosenick L, Finkelstein JC, Kauvar IV, Fenno LE, Adhikari A, Lammel S,  
21       Mirzabekov JJ, Airan RD, Zalocusky KA, Tye KM, Anikeeva P, Malenka RC, Deisseroth  
22       K (2014) Natural neural projection dynamics underlying social behavior. *Cell* 157:1535–  
23       1551.
- 24       Honey CJ, Kötter R, Breakspear M, Sporns O (2007) Network structure of cerebral cortex  
25       shapes functional connectivity on multiple time scales. *Proc Natl Acad Sci USA*  
26       104:10240–10245.

- 1 Hoover WB, Vertes RP (2007) Anatomical analysis of afferent projections to the medial  
2 prefrontal cortex in the rat. *Brain Struct Funct* 212:149–179.
- 3 Horvitz JC, Stewart T, Jacobs BL (1997) Burst activity of ventral tegmental dopamine  
4 neurons is elicited by sensory stimuli in the awake cat. *Brain Res* 759:251–258.
- 5 Huth AG, Nishimoto S, Vu AT, Gallant JL (2012) A continuous semantic space describes the  
6 representation of thousands of object and action categories across the human brain.  
7 *Neuron* 76:1210–1224.
- 8 Jensen O, Mazaheri A (2010) Shaping functional architecture by oscillatory alpha activity:  
9 gating by inhibition. *Front Hum Neurosci* 4:186.
- 10 Jo YS, Lee J, Mizumori SJY (2013) Effects of prefrontal cortical inactivation on neural activity  
11 in the ventral tegmental area. *J Neurosci* 33:8159–8171.
- 12 Kafkas A, Montaldi D (2018) How do memory systems detect and respond to novelty?  
13 *Neurosci Lett* 680:60–68.
- 14 Kaminski J, Mamelak AN, Birch K, Mosher CP, Tagliati M, Rutishauser U (2018) Novelty-  
15 sensitive dopaminergic neurons in the human substantia nigra predict success of  
16 declarative memory formation. *Curr Biol* 28:1333–1343.
- 17 Krebs RM, Heipertz D, Schuetze H, Duzel E (2011) Novelty increases the mesolimbic  
18 functional connectivity of the substantia nigra/ventral tegmental area (SN/VTA) during  
19 reward anticipation: Evidence from high-resolution fMRI. *Neuroimage* 58:647–655.
- 20 Lashley KS (2020) In search of the engram. In: *Brain Physiology and Psychology*, 2nd ed.  
21 (Evans CR, Robertson ADJ, eds), pp 1–32 key papers. Berkely: University of California  
22 Press.
- 23 Liu X, Zhu X-H, Qiu P, Chen W (2012) A correlation-matrix-based hierarchical clustering  
24 method for functional connectivity analysis. *J Neurosci Methods* 211:94–102.
- 25 Ljungberg T, Apicella P, Schultz W (1992) Responses of monkey dopamine neurons during

- 1 learning of behavioral reactions. *J Neurophysiol* 67:145–163.
- 2 Loonis RF, Brincat SL, Antzoulatos EG, Miller EK (2017) A Meta-Analysis Suggests Different  
3 Neural Correlates for Implicit and Explicit Learning. *Neuron* 96:521-534.e7.
- 4 Mathis A, Mamidanna P, Cury KM, Abe T, Murthy VN, Mathis MW, Bethge M (2018)  
5 DeepLabCut: markerless pose estimation of user-defined body parts with deep learning.  
6 *Nat Neurosci* 21:1281–1289.
- 7 Mishra A, Marzban N, Cohen MX, Englitz B (2020) Dynamics of neural microstates in the  
8 VTA-striatal-prefrontal loop during novelty exploration in the rat. *BioRxiv*.
- 9 Moeller S, Crapse T, Chang L, Tsao DY (2017) The effect of face patch microstimulation on  
10 perception of faces and objects. *Nat Neurosci* 20:743–752.
- 11 Montaron MF, Bouyer JJ, Rougeul A, Buser P (1982) Ventral mesencephalic tegmentum  
12 (VMT) controls electrocortical beta rhythms and associated attentive behaviour in the  
13 cat. *Behav Brain Res* 6:129–145.
- 14 Mumby DG (2001) Perspectives on object-recognition memory following hippocampal  
15 damage: lessons from studies in rats. *Behav Brain Res* 127:159–181.
- 16 O’Carroll CM, Martin SJ, Sandin J, Frenguelli B, Morris RGM (2006) Dopaminergic  
17 modulation of the persistence of one-trial hippocampus-dependent memory. *Learn Mem*  
18 13:760–769.
- 19 Otmakhova N, Duzel E, Deutch AY, Lisman J (2013) The hippocampal-VTA loop: the role of  
20 novelty and motivation in controlling the entry of information into long-term memory. In:  
21 *Intrinsically motivated learning in natural and artificial systems* (Baldassarre G, Mirolli M,  
22 eds), pp 235–254. Berlin, Heidelberg: Springer Berlin Heidelberg.
- 23 Packard MG, McGaugh JL (1996) Inactivation of hippocampus or caudate nucleus with  
24 lidocaine differentially affects expression of place and response learning. *Neurobiol*  
25 *Learn Mem* 65:65–72.

- 1 Parra LC, Spence CD, Gerson AD, Sajda P (2005) Recipes for the linear analysis of EEG.  
2 Neuroimage 28:326–341.
- 3 Paxinos G, Watson C (2006) The rat brain in stereotaxic coordinates: hard cover edition.
- 4 Prensa L, Parent A (2001) The nigrostriatal pathway in the rat: A single-axon study of the  
5 relationship between dorsal and ventral tier nigral neurons and the striosome/matrix  
6 striatal compartments. J Neurosci 21:7247–7260.
- 7 Raichle ME (2015) The brain's default mode network. Annu Rev Neurosci 38:433–447.
- 8 Rajasethupathy P, Sankaran S, Marshel JH, Kim CK, Ferenczi E, Lee SY, Berndt A,  
9 Ramakrishnan C, Jaffe A, Lo M, Liston C, Deisseroth K (2015) Projections from  
10 neocortex mediate top-down control of memory retrieval. Nature 526:653–659.
- 11 Rissman J, Wagner AD (2012) Distributed representations in memory: insights from  
12 functional brain imaging. Annu Rev Psychol 63:101–128.
- 13 Rousseeuw PJ (1987) Silhouettes: A graphical aid to the interpretation and validation of  
14 cluster analysis. Journal of Computational and Applied Mathematics 20:53–65.
- 15 Rubinov M, Sporns O (2010) Complex network measures of brain connectivity: uses and  
16 interpretations. Neuroimage 52:1059–1069.
- 17 Schmahmann J, Pandya D (2006) Fiber Pathways of the Brain. New York: Oxford University  
18 Press.
- 19 Schultheiss NW, Schlecht M, Jayachandran M, Brooks DR, McGlothan JL, Guilarte TR,  
20 Allen TA (2019) 'Awake delta' and theta-rhythmic hippocampal network modes during  
21 intermittent locomotor behaviors in the rat. BioRxiv.
- 22 Singer W (2009) Distributed processing and temporal codes in neuronal networks. Cogn  
23 Neurodyn 3:189–196.
- 24 Squire LR, Zola-Morgan M (1991) Memory and brain. Oxford: Oxford University Press.  
25 Harb Perspect Biol 7:a021667.



- 1 Strehl A, Ghosh J (2002) Cluster Ensembles--A knowledge reuse framework for combining  
2 multiple partitions. *J Mach Learn Res* 3:583–617.
- 3 Tan P-N, Steinbach M, Karpatne A, Kumar V (2018) *Introduction to Data Mining* (2nd  
4 Edition) (What's New in Computer Science), 2nd ed. NY NY: Pearson.
- 5 Turk-Browne NB, Scholl BJ, Chun MM, Johnson MK (2009) Neural evidence of statistical  
6 learning: efficient detection of visual regularities without awareness. *J Cogn Neurosci*  
7 21:1934–1945.
- 8 Wang X-J (2010) Neurophysiological and computational principles of cortical rhythms in  
9 cognition. *Physiol Rev* 90:1195–1268.
- 10 Williams D, Tijssen M, Van Bruggen G, Bosch A, Insola A, Di Lazzaro V, Mazzone P,  
11 Oliviero A, Quartarone A, Speelman H, Brown P (2002) Dopamine-dependent changes  
12 in the functional connectivity between basal ganglia and cerebral cortex in humans.  
13 *Brain* 125:1558–1569.
- 14 Wimmer GE, Braun EK, Daw ND, Shohamy D (2014) Episodic memory encoding interferes  
15 with reward learning and decreases striatal prediction errors. *J Neurosci* 34:14901–  
16 14912.
- 17 Wimmer GE, Shohamy D (2012) Preference by association: how memory mechanisms in  
18 the hippocampus bias decisions. *Science* 338:270–273.
- 19

1 TABLES:

| Region | Delta ( $\delta$ ) | Theta ( $\theta$ ) | Beta ( $\beta$ ) | Gamma low ( $\gamma_L$ ) | Gamma high ( $\gamma_H$ ) |
|--------|--------------------|--------------------|------------------|--------------------------|---------------------------|
| PFC    | 2-4.6              | 4.6-12.0           | 12.0-34.3        | 34.3-79.4                | 79.4-150                  |
| STR    | 2-4.6              | 4.6-8.7            | 8.7-38.2         | 38.2-79.4                | 79.4-150                  |
| VTA    | 2-3.8              | 3.8-8.8            | 8.8-14.8         | 14.8-47.1                | 47.1-150                  |

2 Table 1. Divisions between frequency bands, values in Hz

3

4

1 Extended Data TABLES:

| PFC               | Df    | SumSq | MeanSq | F     | P    | eta <sup>2</sup> partial |
|-------------------|-------|-------|--------|-------|------|--------------------------|
| condition         | 3.00  | 0.04  | 0.01   | 0.56  | 0.64 |                          |
| frequency         | 4.00  | 0.35  | 0.09   | 4.13  | 0.00 | 0.18                     |
| <i>high gamma</i> | 1.00  | 0.28  | 0.28   | 13.36 | 0.00 |                          |
| interaction       | 12.00 | 0.04  | 0.00   | 0.17  | 1.00 |                          |
| Residuals         | 76.00 | 1.62  | 0.02   |       |      |                          |

| STR              | Df    | SumSq | MeanSq | F    | P    | eta <sup>2</sup> partial |
|------------------|-------|-------|--------|------|------|--------------------------|
| condition        | 3.00  | 0.03  | 0.01   | 0.36 | 0.79 |                          |
| frequency        | 4.00  | 0.41  | 0.10   | 3.67 | 0.01 | 0.16                     |
| <i>theta</i>     | 1.00  | 0.12  | 0.12   | 4.23 | 0.04 |                          |
| <i>low gamma</i> | 1.00  | 0.24  | 0.24   | 8.35 | 0.01 |                          |
| interaction      | 12.00 | 0.06  | 0.00   | 0.17 | 1.00 |                          |
| Residuals        | 76.00 | 2.14  | 0.03   |      |      |                          |

| VTA          | Df    | SumSq | MeanSq | F     | P    | eta <sup>2</sup> partial |
|--------------|-------|-------|--------|-------|------|--------------------------|
| condition    | 3.00  | 0.10  | 0.03   | 1.56  | 0.21 |                          |
| frequency    | 4.00  | 1.47  | 0.37   | 17.55 | 0.00 | 0.48                     |
| <i>delta</i> | 1.00  | 1.42  | 1.42   | 67.55 | 0.00 |                          |
| interaction  | 12.00 | 0.14  | 0.01   | 0.54  | 0.88 |                          |
| Residuals    | 76.00 | 1.59  | 0.02   |       |      |                          |

2

3

Extended Data Figure 6-1. Cluster stability across conditions within frequency

4

| PFC                   | Df    | SumSq | MeanSq | F     | P    | eta <sup>2</sup><br>partial |
|-----------------------|-------|-------|--------|-------|------|-----------------------------|
| condition             | 3.00  | 0.12  | 0.04   | 3.79  | 0.01 | 0.13                        |
| <i>Object periods</i> | 1.00  | 0.08  | 0.08   | 7.18  | 0.01 |                             |
| frequency             | 4.00  | 0.18  | 0.04   | 4.19  | 0.00 | 0.18                        |
| <i>high gamma</i>     | 1.00  | 0.15  | 0.15   | 13.94 | 0.00 |                             |
| interaction           | 12.00 | 0.07  | 0.01   | 0.56  | 0.87 |                             |
| Residuals             | 76.00 | 0.80  | 0.01   |       |      |                             |

| STR         | Df    | SumSq | MeanSq | F    | P    | eta <sup>2</sup><br>partial |
|-------------|-------|-------|--------|------|------|-----------------------------|
| condition   | 3.00  | 0.09  | 0.03   | 2.13 | 0.10 |                             |
| frequency   | 4.00  | 0.13  | 0.03   | 2.20 | 0.08 |                             |
| interaction | 12.00 | 0.05  | 0.00   | 0.28 | 0.99 |                             |
| Residuals   | 76.00 | 1.12  | 0.01   |      |      |                             |

| VTA                   | Df    | SumSq | MeanSq | F     | P    | eta <sup>2</sup><br>partial |
|-----------------------|-------|-------|--------|-------|------|-----------------------------|
| condition             | 3.00  | 0.27  | 0.09   | 9.48  | 0.00 | 0.27                        |
| <i>Object periods</i> | 1.00  | 0.23  | 0.23   | 24.57 | 0.00 |                             |
| frequency             | 4.00  | 0.40  | 0.10   | 10.62 | 0.00 | 0.36                        |
| <i>delta</i>          | 1.00  | 0.13  | 0.13   | 13.98 | 0.00 |                             |
| <i>beta/gamma</i>     | 1.00  | 0.05  | 0.05   | 5.07  | 0.03 |                             |
| <i>high gamma</i>     | 1.00  | 0.22  | 0.22   | 23.40 | 0.00 |                             |
| interaction           | 12.00 | 0.16  | 0.01   | 1.42  | 0.18 |                             |
| Residuals             | 76.00 | 0.72  | 0.01   |       |      |                             |

1

2 Extended Data Figure 6-2. Cluster stability across frequency within condition

3

Baseline vs.

| Encoding      | Df     | SumSq | MeanSq | F      | P    | eta <sup>2</sup><br>partial |
|---------------|--------|-------|--------|--------|------|-----------------------------|
| cond          | 1.00   | 4.52  | 4.52   | 114.26 | 0.00 | 0.29                        |
| freq          | 4.00   | 16.72 | 4.18   | 105.76 | 0.00 | 0.60                        |
| reg           | 2.00   | 0.30  | 0.15   | 3.82   | 0.02 | 0.03                        |
| cond:freq     | 4.00   | 2.05  | 0.51   | 12.96  | 0.00 | 0.16                        |
| cond:reg      | 2.00   | 0.16  | 0.08   | 1.99   | 0.14 |                             |
| freq:reg      | 7.00   | 0.85  | 0.12   | 3.08   | 0.00 | 0.07                        |
| cond:freq:reg | 7.00   | 0.24  | 0.03   | 0.86   | 0.54 |                             |
| Residuals     | 288.00 | 13.04 | 0.05   |        |      |                             |

1

2

Extended Data Figure 7-1. Strength changes baseline vs. encoding

3

Baseline vs.

| Consolidation | Df     | SumSq | MeanSq | F      | P    | eta <sup>2</sup><br>partial |
|---------------|--------|-------|--------|--------|------|-----------------------------|
| cond          | 1.00   | 0.00  | 0.00   | 0.06   | 0.81 |                             |
| freq          | 4.00   | 25.56 | 6.39   | 141.14 | 0.00 | 0.66                        |
| reg           | 2.00   | 0.28  | 0.14   | 3.09   | 0.05 | 0.02                        |
| cond:freq     | 4.00   | 1.59  | 0.40   | 8.79   | 0.00 | 0.11                        |
| cond:reg      | 2.00   | 0.01  | 0.00   | 0.08   | 0.92 |                             |
| freq:reg      | 7.00   | 1.78  | 0.25   | 5.62   | 0.00 | 0.12                        |
| cond:freq:reg | 7.00   | 0.52  | 0.07   | 1.63   | 0.13 |                             |
| Residuals     | 288.00 | 13.04 | 0.05   |        |      |                             |

1

2 Extended Data Figure 7-2. Strength changes baseline vs. consolidation

3

| Baseline vs.<br>Retrieval | Df     | SumSq | MeanSq | F      | P    | eta <sup>2</sup><br>partial |
|---------------------------|--------|-------|--------|--------|------|-----------------------------|
| cond                      | 1.00   | 4.22  | 4.22   | 121.23 | 0.00 | 0.30                        |
| freq                      | 4.00   | 16.98 | 4.25   | 122.03 | 0.00 | 0.63                        |
| reg                       | 2.00   | 0.11  | 0.05   | 1.54   | 0.22 |                             |
| cond:freq                 | 4.00   | 2.10  | 0.53   | 15.10  | 0.00 | 0.18                        |
| cond:reg                  | 2.00   | 0.08  | 0.04   | 1.13   | 0.32 |                             |
| freq:reg                  | 7.00   | 1.05  | 0.15   | 4.31   | 0.00 | 0.10                        |
| cond:freq:reg             | 7.00   | 0.10  | 0.01   | 0.41   | 0.90 |                             |
| Residuals                 | 283.00 | 9.84  | 0.04   |        |      |                             |

1

2 Extended Data Figure 7-3. Strength changes baseline vs. retrieval

3

1 FIGURE CAPTIONS:

2 **Fig. 1 Behavioral paradigm and behavior results.** **a** Still image taken from video recording  
3 of an experimental session. The rat is exploring a white object. **b** Output of movement tracking  
4 results for the frame shown in panel **a**. **c** Example experimental session behavioral data. Stars  
5 indicate the presence of an object to explore (encoding and retrieval periods). During baseline  
6 and consolidation periods, there were no objects in the box. Different objects were used on  
7 different testing days. Within day, the same object was used in the encoding and retrieval  
8 periods. In the bottom of each panel is the path followed by the rat during the corresponding  
9 condition. Orange versus blue points differentiate locations with and without interaction with  
10 the object, respectively. **d** Median distribution of animal speed movement from all the  
11 recordings. The dashed line shows the motion speed threshold separating resting from  
12 movement. **e** Histogram depicts memory for the object in terms of the percentage of time spent  
13 interacting with the object during the encoding period minus the corresponding percentage  
14 during the retrieval period. In general, more time was spent interacting with the object when it  
15 was novel (after removal of outliers more than 2 SDs below mean  $t(25)=4$ ;  $p<<.001$ ). **f** Pie  
16 charts show percentages of time spent in different behavioral states during each of the  
17 behavioral conditions.

18

19 **Fig. 2 Power spectra do not differ reliably between conditions.** **a** Recording locations are  
20 shown for the PFC (left), STR (middle), and VTA (Right). Scale bars indicate 2mm. **b-g** Group  
21 mean relative power spectra are displayed. Power spectra were calculated for each channel.  
22 Channel spectra were averaged and normalized to the summed spectral power across  
23 frequencies within each animal and region. Shaded regions indicate standard error of the  
24 group mean. **h-m** Relative power is shown for every channel individually, which highlights the  
25 variability in the spectra of individual channels.

26



1 **Fig. 3 Clustering methods and validation.** **a** Unsorted channel X channel correlation matrix  
2 for rat 5 during the baseline period constructed using data narrowband filtered at 5.2 Hz. **b**  
3 The same set of correlations after application of sorting pipeline. **c** Silhouette values  
4 associated with each channel. One cluster in the STR had low silhouette values, indicating  
5 poor clustering (this cluster was removed from subsequent analyses). **d** Clusters detected in  
6 “All Data” (far left column) and in each of 20 validation folds. Different pseudo-colors indicate  
7 different clusters. The channels comprising the cluster with low silhouette values are not  
8 always clustered together, indicating instability (pink with blue stripes) (note that an entire  
9 cluster can switch colors in different folds; the important metric is whether the color is  
10 homogeneous across channels within the cluster). **e-m** These panels display the clustering  
11 pipeline. **e** Each region’s correlation matrix is considered separately. The VTA is shown here.  
12 **f** The correlation between each row and column of the correlation matrix is calculated.  
13 Channels from electrodes 28 and 33 are displayed as examples. **g** These correlations are  
14 organized in a matrix that encodes similarities of connectivity profiles, rather than bivariate  
15 correlations. **h** This connectivity-profile correlation matrix was transformed into a Euclidean  
16 distance matrix to increase contrast and enforce positivity. **i** The k-distance for each channel  
17 represents how far (epsilon; y-axis) one would have to go in units of squared distance (panel  
18 **h**) in order to find k nearest neighbors. K is set to 8. Values are sorted from smallest to largest.  
19 **j** The derivative of the k-distances was approximated by taking the running difference between  
20 pairs of k-distances. The horizontal dashed line indicates the detection threshold for sharp  
21 discontinuity. The vertical solid line indicates a local peak. The arrow pointing back to panel **i**  
22 shows how the detected index in the derivative is used to select the corresponding epsilon  
23 value. This epsilon is used as input to the DBscan algorithm for clustering. **k-m** Correspond to  
24 the matrices shown in panels **e,g**, and **h**, but with channels sorted according to the result of  
25 the DBscan clustering. Cluster borders are indicated with dashed lines. **n** Mean silhouette  
26 values across channels in clusters that were stable across 20-fold validation (blue) and in  
27 clusters that were not stable across 20-fold validation (red). Stability was not determined using

1 silhouette value (see methods), and there was no mathematical necessity that stable clusters  
2 would be expected to have higher silhouette values.

3

4 **Fig. 4 Characteristics of clusters.** **a** Histograms show distributions of correlations for pairs  
5 of channels that were within the same cluster (blue) or between channels from different  
6 clusters (red). **b** The histogram shows the distribution of difference scores calculated by  
7 subtracting between-cluster correlations from within-cluster correlations. Subtractions carried  
8 out for correlation values from the same animal, region, condition, and frequency. **c-d** Similar  
9 to a and b, but clusters were chosen randomly. **e** Histograms show the distributions of variance  
10 in power between channels within a cluster divided by the variance in power between channels  
11 within the corresponding region. Lower values indicate that there is less variance in power  
12 within a cluster than would be expected given the variance in its containing region. The red  
13 histogram shows the values calculated for observed clusters. The grey histogram shows the  
14 values calculated for random clusters. **f** The first component of a generalized  
15 eigendecomposition (GED) performed on the channels within each cluster generally explained  
16 between 13% and 17% of between channel signal variance. The y-axis displays variance  
17 explained by the first GED component. The x-axis displays frequency. Higher values indicate  
18 that the entire cluster is well-characterized by a single time-series. **g** There was a larger  
19 number of smaller clusters detected at higher frequencies. The left y-axis displays the number  
20 of channels grouped into each cluster. The right y-axis displays the total number of clusters  
21 detected. The x-axis displays frequency. For panels **f** and **g**, shaded regions indicate standard  
22 error of the group mean.

23 **Fig. 5 Defining frequency bands and combining clusters within bands.** **a-c** Heat maps  
24 display the average normalized mutual information (aNMI) between cluster maps at different  
25 frequency bands. Averaging was done across rats and conditions. Dashed lines indicate the  
26 output of a greedy search algorithm that divided frequency space into bands. **d-e** Channel-by-

1 frequency maps illustrating the aNMI-maximizing clustering results. The y-axis represents  
2 channel. The x-axis represents frequency. Pseudo colors indicate cluster groups. **e** A single  
3 cluster map has been constructed for all frequencies within the band such that aNMI between  
4 the final cluster map and the maps associated with the different frequencies within the band  
5 (panel **d**) has been maximized.

6 **Fig. 6 Intra-regional cluster stability.** **a-f** Average normalized mutual information (aNMI)  
7 calculated across conditions but within frequency band. **a** PFC aNMI values (y-axis) are  
8 displayed for the four conditions (x-axis). Each line indicates results for a different frequency  
9 band (legend is next to panel **j**). Dashed lines indicate expected values in an analysis of  
10 random clusters. **b** PFC aNMI values were grouped by frequency band. Violin plots show  
11 aNMI values (y-axis) for condition similarity per frequency (x-axis). Each animal is represented  
12 by 4 dots (one for each condition) for each frequency. **c-d** Similar to **a-b** except for the STR.  
13 **e-f** Similar to **a-b** except for the VTA. Delta had lower aNMI than other frequency bands. **g-m**  
14 aNMI calculated across frequencies but within condition. **g** PFC aNMI values (y-axis) are  
15 displayed for the five frequency bands (x-axis). Each line indicates results for a different  
16 condition. **h** PFC aNMI was grouped by condition. Violin plots show aNMI values (y-axis) for  
17 frequency similarity calculated within each condition (x-axis). Each animal is represented by 5  
18 dots (one for each frequency) for each condition. **i** PFC aNMI was grouped by frequency,  
19 generating a plot similar to **b**, except the underlying calculation here was within condition  
20 instead of within frequency. **j** Similar to panel **g** for data from the STR. **k-m** similar to **g-i** for  
21 data from the VTA. **n** Histogram shows aNMI in the between frequency (red) and between  
22 condition (blue) analyses. Between-frequency comparisons generally had lower aNMI. **o-q**  
23 Examples of cluster remapping. Anatomical location of recording array is shown to the left,  
24 and clusters are mapped to anatomical space in panels to the right. Pseudo colors indicate  
25 different clusters (unassigned channels have no color). **o** This example shows that high  
26 gamma in the PFC had a cluster scheme different from the other bands (see also lower aNMI  
27 values in panel **i**). **p** Clusters in the low gamma band in the STR. Note the stability in cluster

1 organization across conditions (see also panel **d**). **q** This example demonstrates the effect  
2 observed in panel **e**. Namely, delta in the VTA had an unstable cluster map across conditions.  
3 Stars indicate significant linear contrasts in an ANOVA model.

4 **Fig. 7 Dynamics of inter-regional connectivity across behavioral epochs. a-d** Group  
5 mean correlations between signals derived from frequency-specific regional clusters are  
6 shown as line thickness. Solid lines range from  $p=.05$  to  $p=.20$ . Dashed lines represent weaker  
7 connections ( $p>0.0$ ). All visualized connections were significant at the individual level for at  
8 least 4/5 animals. Each animal contributed only its strongest single connection to each graph  
9 edge. Node size represents betweenness centrality. These connection strengths are reused  
10 in panels **e-k**. **e** Group mean change relative to baseline in connection strength for connections  
11 between nodes within different frequency bands. Inter-regional connections in the theta band  
12 had marginally increased strength in the consolidation and retrieval periods (t-test against 0,  
13  $p<.07$ ). Connections in the beta band had increased strength in the consolidation period  
14 ( $p=.0503$ ). **f-h** Specific connections that exhibited increased strength relative to baseline in the  
15 encoding (**f**), consolidation (**g**), and retrieval (**h**) periods. **i-k** Similar to **f-h**, but for decreased  
16 strength connections. Throughout **f-k**, solid lines represent connectivity changes of  
17 between  $p=.0125$  and  $p=.07$ . Dashed lines represent weaker connections ( $p>0.0$ ). **l-o** Graph  
18 theoretic measurements of each animal's connectivity matrix were calculated for all significant  
19 connections (rather than taking only each animal's strongest edge between any two nodes).  
20 Metrics were z-scored for display on a single scale. Node-metrics from all animals were  
21 combined and sorted by strength for plotting. In general, nodes with high strength also had  
22 high betweenness centrality, high clustering coefficients, and low mean path lengths. **p-s**  
23 Summed strength values of all nodes in different regions (y-axis) and within different frequency  
24 bands (x-axis). Marginal histograms display the mean value of their respective rows or  
25 columns of the heatmap. Overall node strength was lower in the encoding and retrieval periods  
26 (panels **q** and **s**), and the frequency of peak nodal strength shifted from delta to theta when  
27 comparing baseline (panel **p**) to consolidation (panel **r**).

1 **Extended data Fig 3-1 Choosing k for DBscan.** **a** the mean silhouette value (y-axis) of  
2 clustering schemes calculated for all rats, regions, conditions, and frequencies using  
3 different values of k (x-axis). **b** The maximum silhouette value (y-axis) of clustering schemes  
4 calculated for different values of k (x-axis). **c** The proportion of silhouette values greater than  
5 .4 (y-axis) for different values of k (x-axis).

6  
7 **Extended data Fig 7-1 Network connections related to memory.** For significant  
8 connections (main text Fig. 7a-d), we assessed the correlation between session connection  
9 strength and session memory. Memory was calculated as the proportion of time spent  
10 exploring the object during the encoding period minus the similar proportion for the retrieval  
11 period. There were two outlier sessions with memory  $<-.2$  (main text Figure 1e), which were  
12 excluded from this analysis. **a-d** Network maps depicting connections that exhibited a  
13 significant correlation with memory strength. **e-l** Scatter plots depict the individual data points  
14 that went into all significant correlations. Before calculating correlations, each animal's mean  
15 connection strength across sessions and mean memory strength across sessions were  
16 calculated. These animal mean values were submitted to correlation analysis. This analysis  
17 was also done using data from individual sessions in the correlation analysis. In general, a  
18 similar set of significant correlations were discovered. Different colors/shapes of points  
19 indicate the individual sessions for different animals. The large black circles indicate animal  
20 means. The regression line of best fit is shown (all  $ps < .05$ ).

21  
22 **Extended data Fig 7-2 Network connections between clusters versus between**  
23 **regions.** **a-d** Network maps are the same as panels **a-d** of Figure 7 (main text). **e-h** Network  
24 maps are calculated using all the same procedures as those in **a-d**, except each region was  
25 treated as a single cluster. Without considering the functional organization of signals within  
26 region (using clustering), many of the connections detected in panels **a-d** were missed in  
27 panels **e-h**. This is particularly evident during the retrieval period (panel h) where all of the  
28 complex high frequency interactions between regions have been missed.

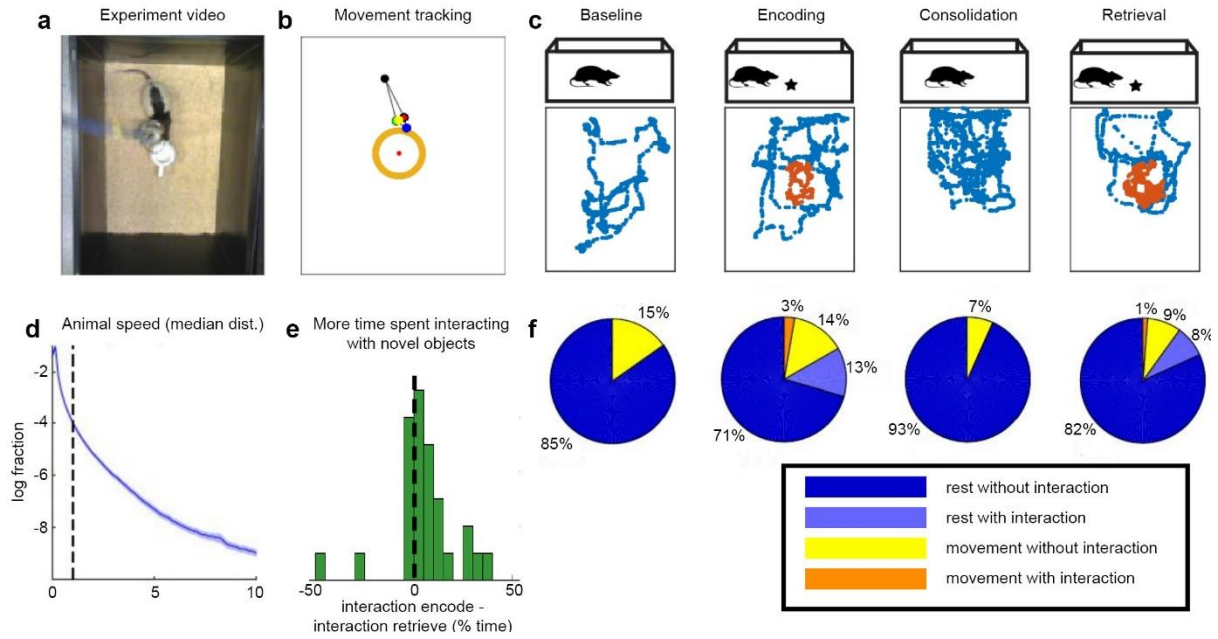

1  
2 Figure 1  
3

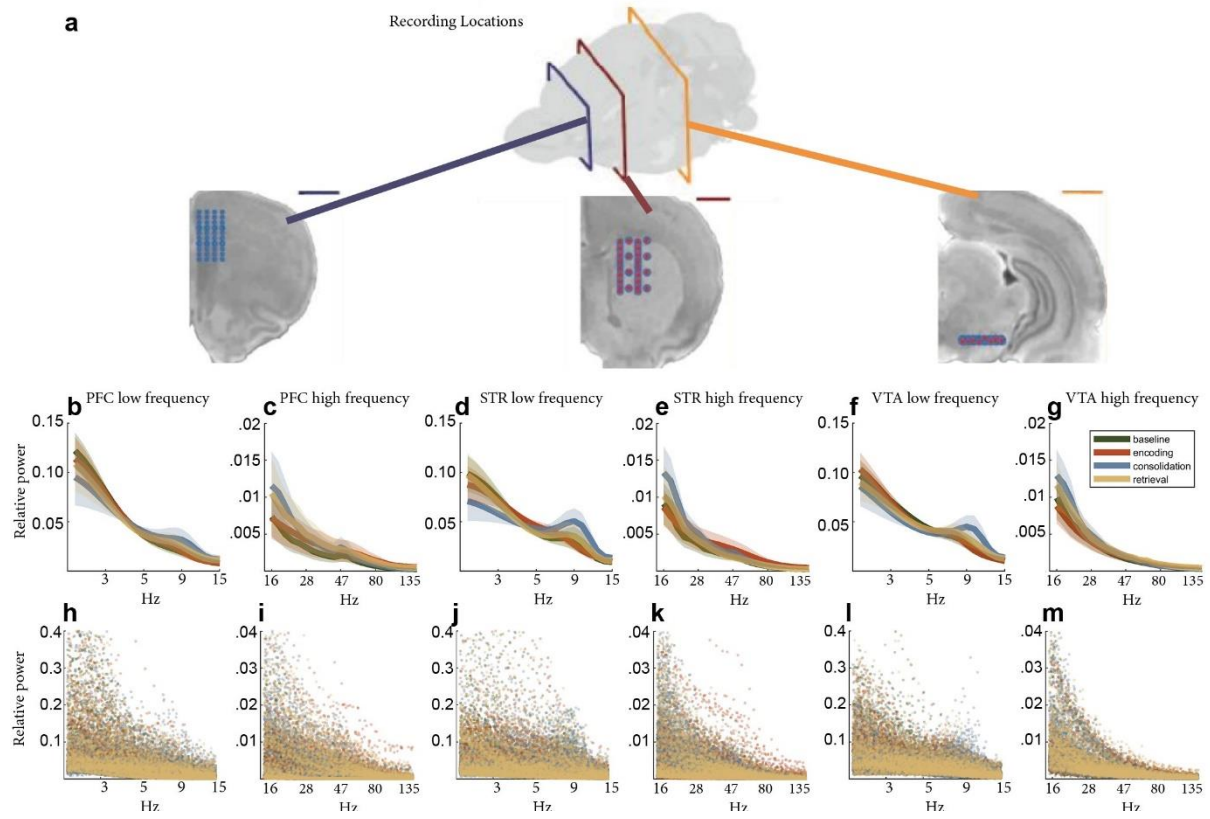

1  
2  
3

Figure 2



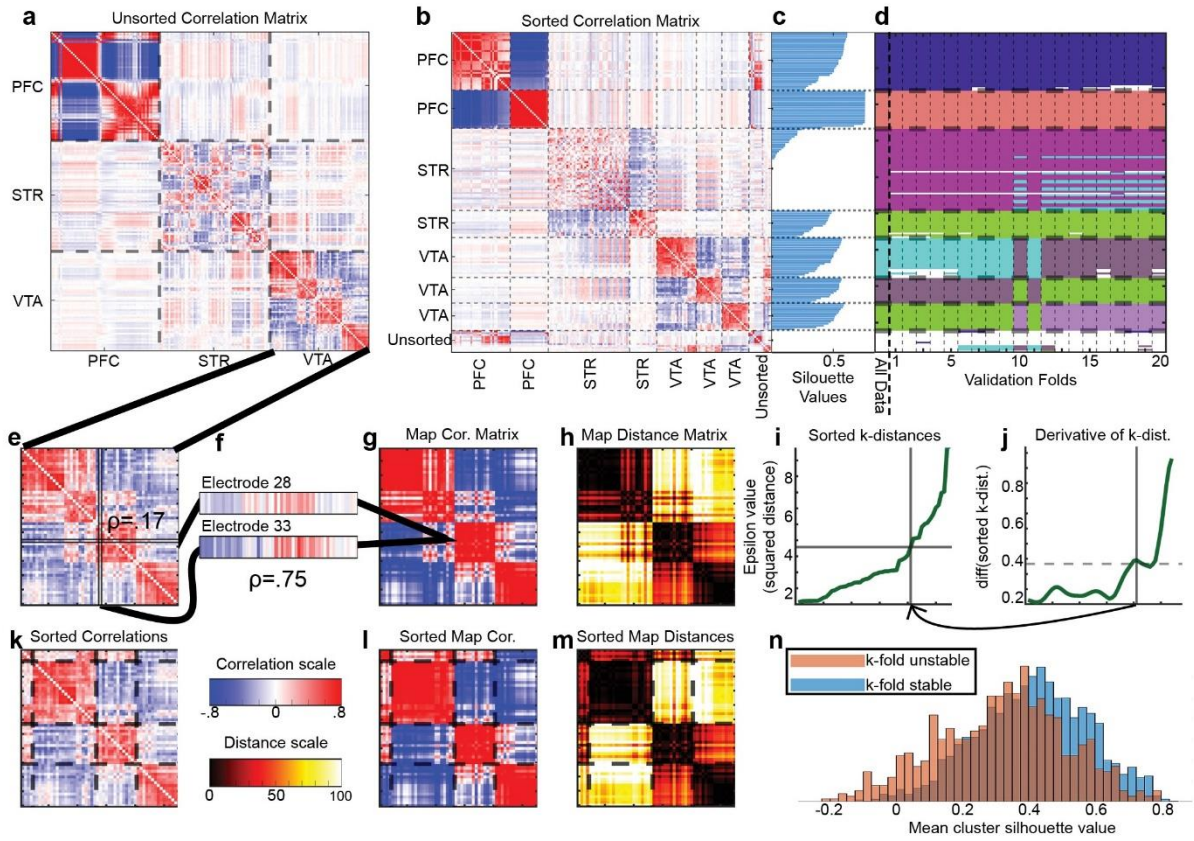

1  
2 Figure 3  
3



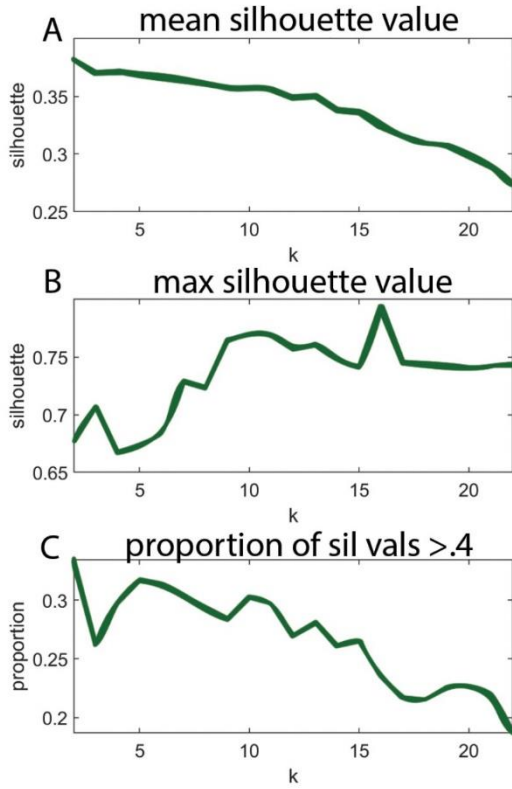

1  
2 Extended Data Figure 3-1  
3

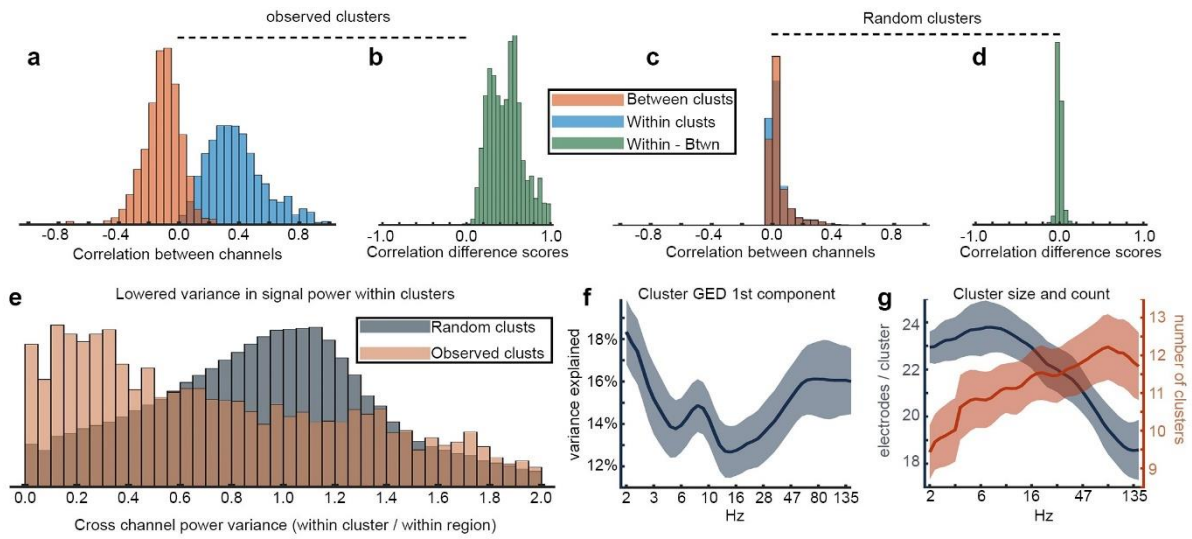

1  
2  
3

Figure 4

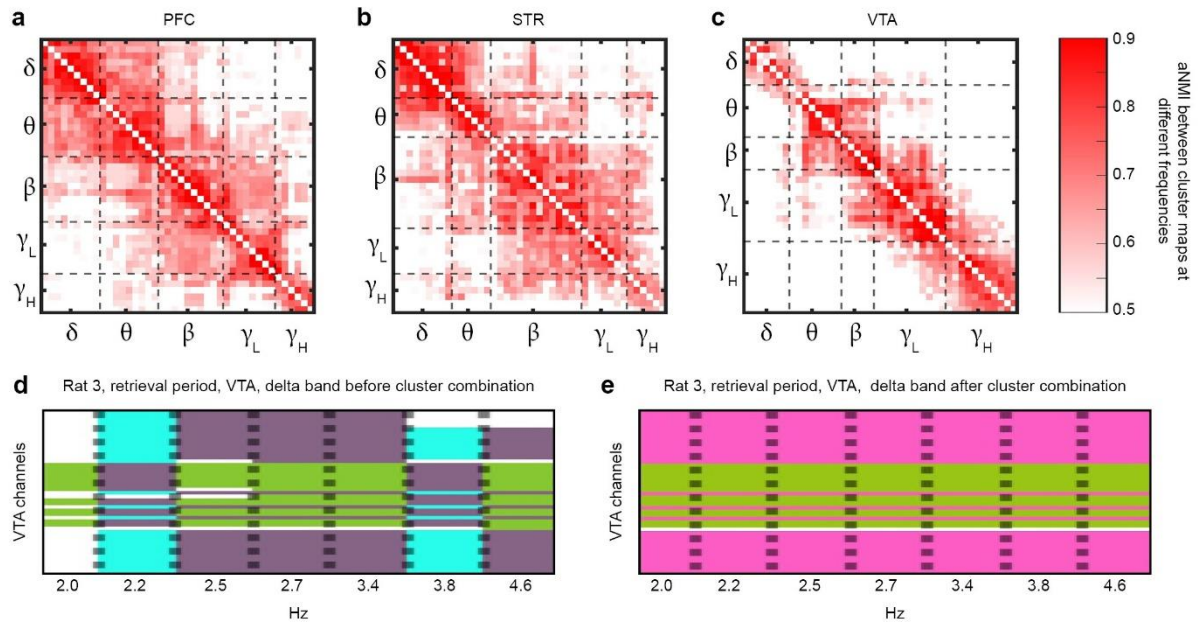

1  
2  
3

Figure 5

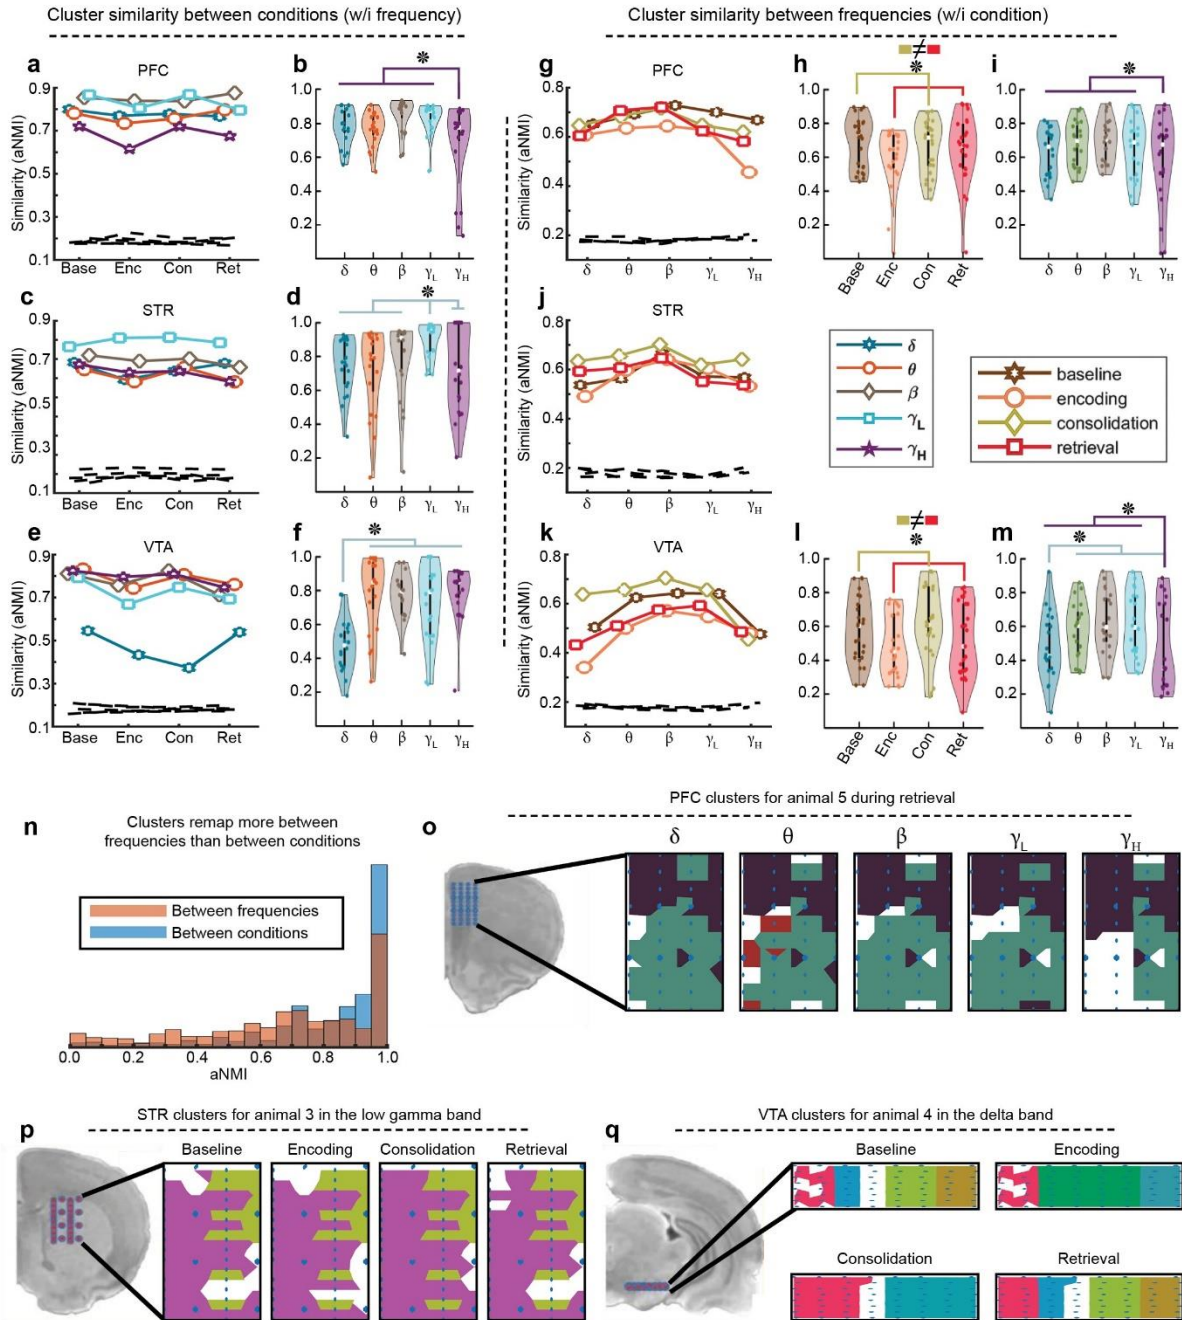

1  
2  
3

Figure 6

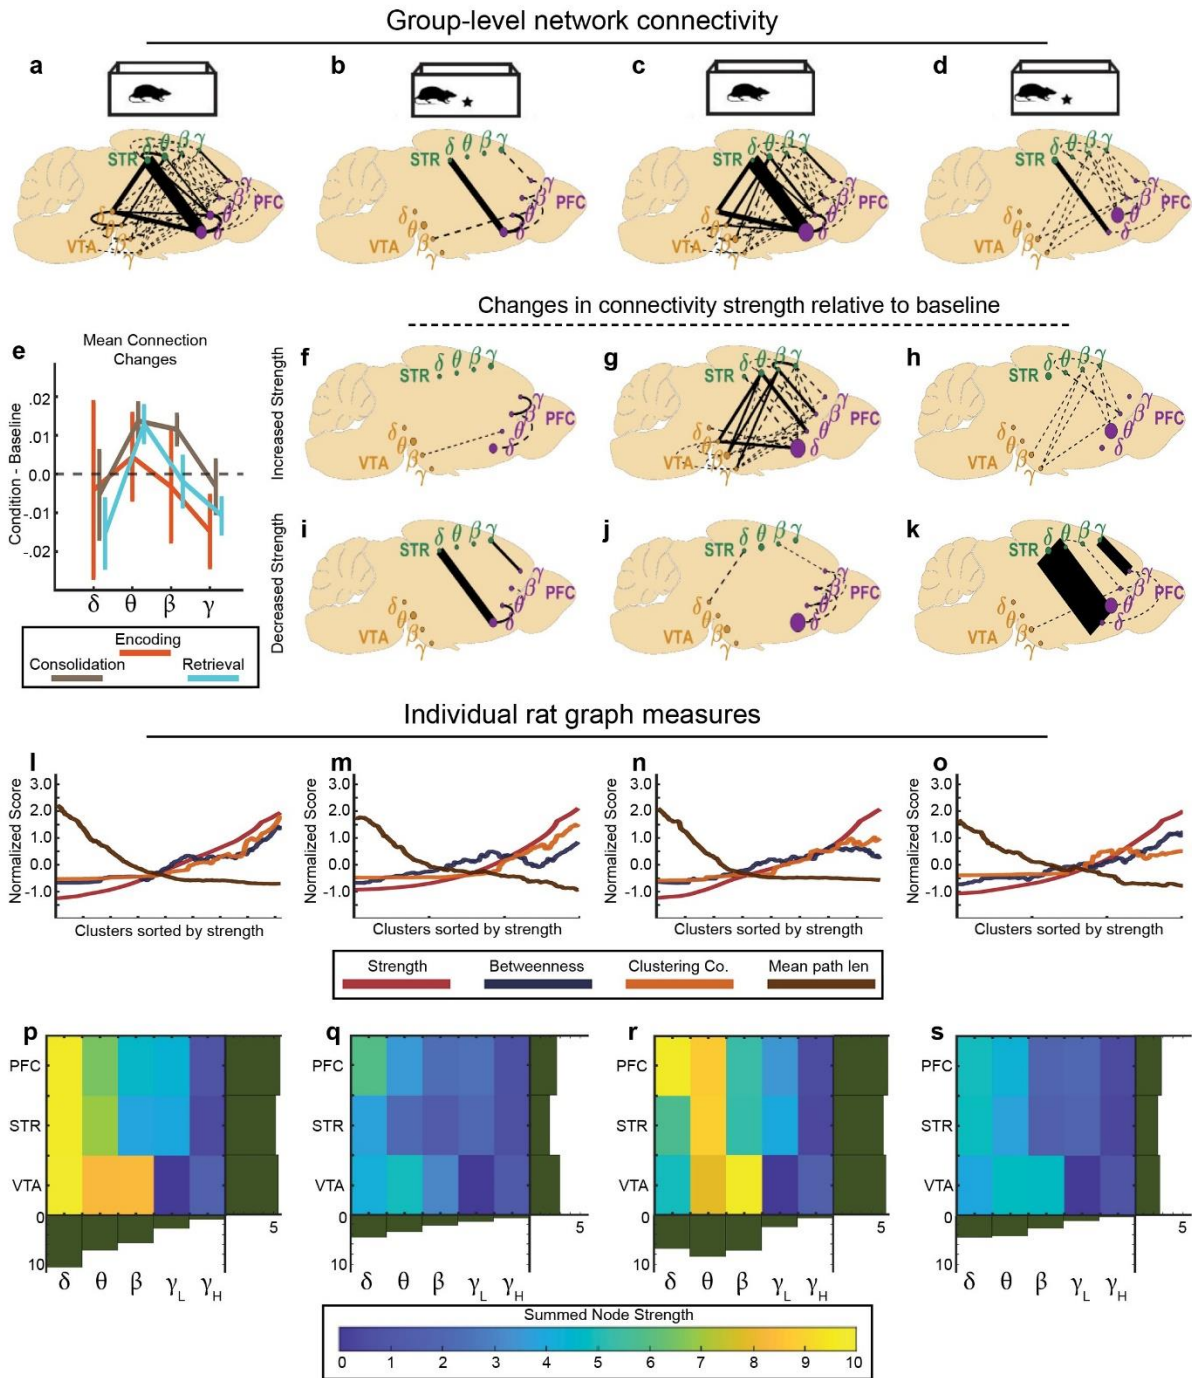

1  
2 Figure 7  
3



### Group-level memory-predicting connections

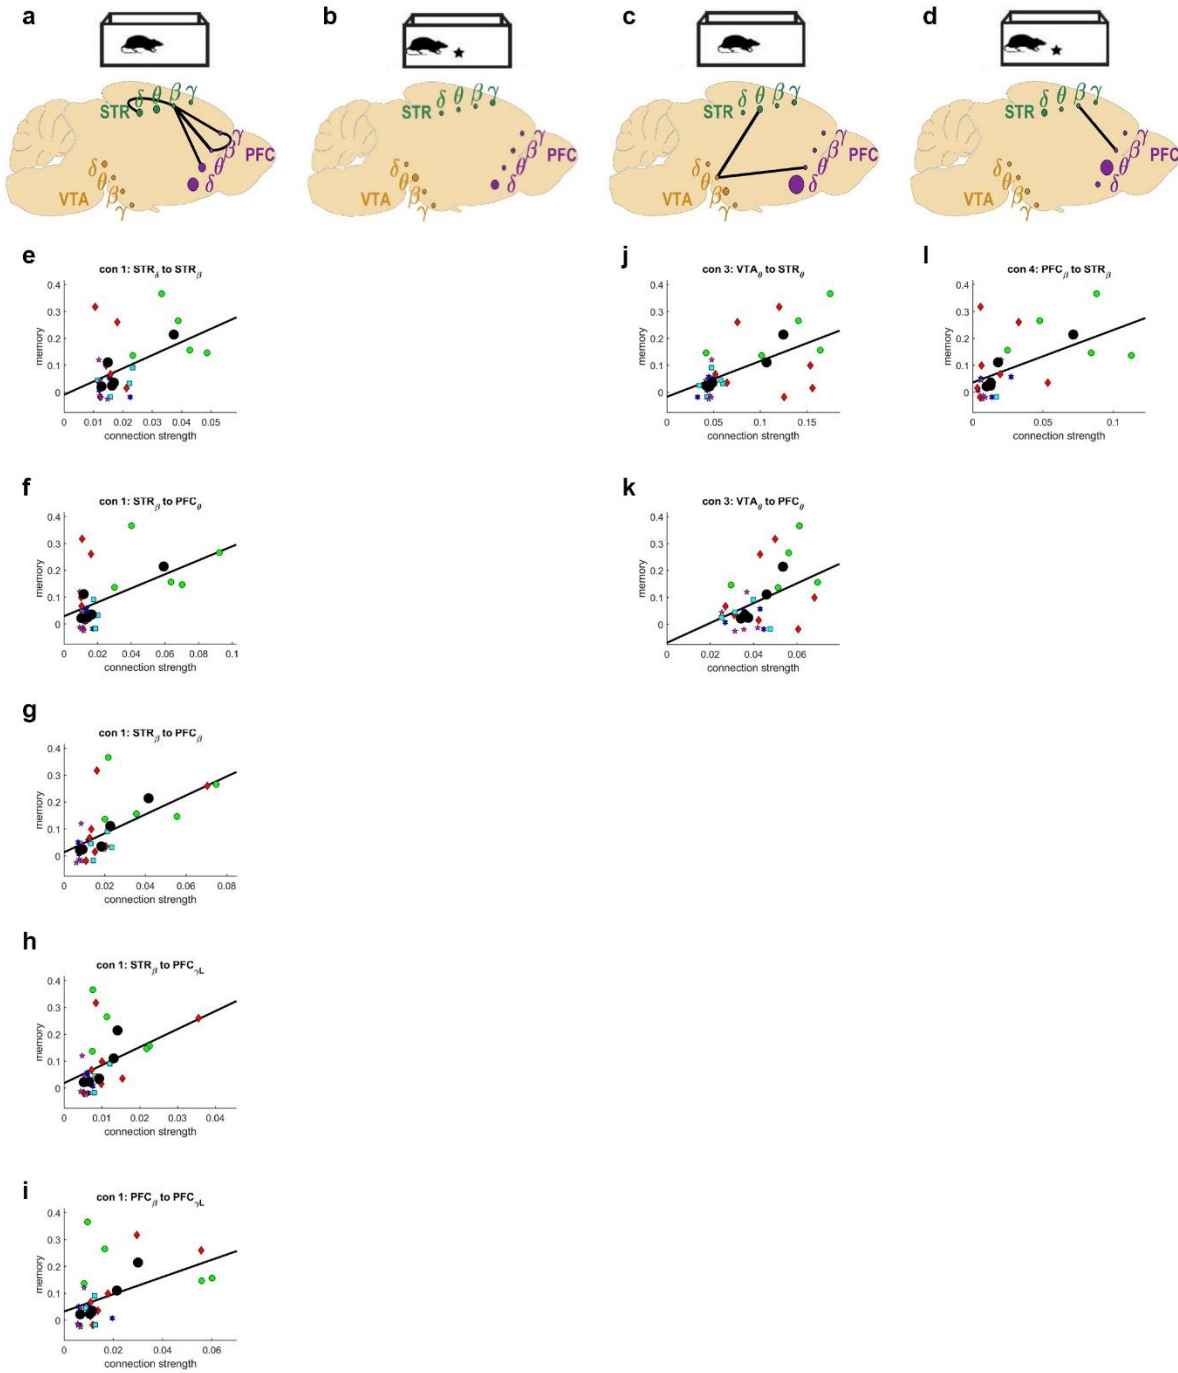

1  
2 Extended Data Figure 7-1  
3

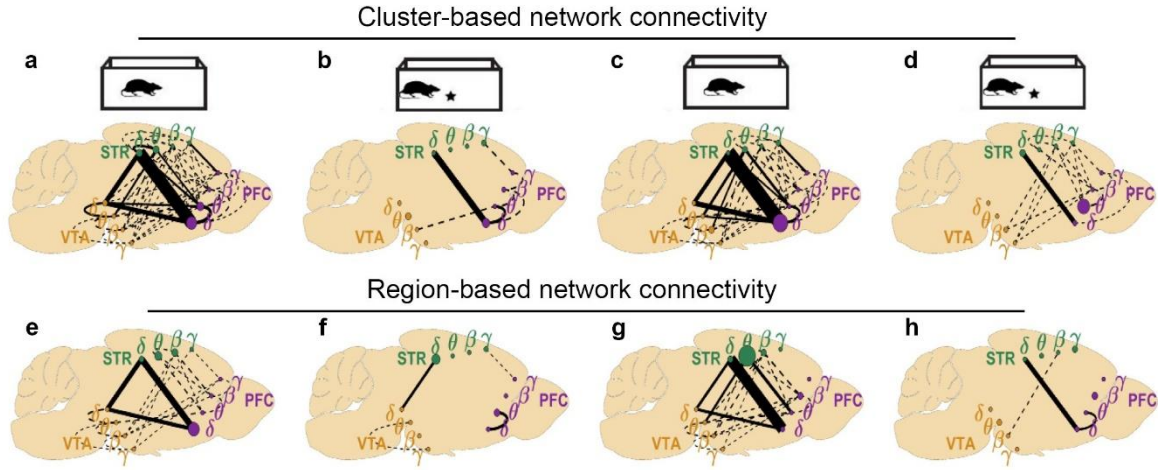

1

2 Extended Data Figure 7-2
